# Supplementary material for: Studying the Long-term Impact of COVID-19 in Kids (SLICK). Healthcare use and costs in children and young people following community-acquired SARS-CoV-2 infection: protocol for an observational study using linked primary and secondary routinely collected healthcare data from England, Scotland and Wales
Source: PubMed Central journal article supplement (PMC9659708; doi:10.1136/bmjopen-2022-063271), 2022-11-10
Supplement: bmjopen-2022-063271.draft_revisions.pdf [file bmjopen-2022-063271.draft_revisions.pdf]

# BMJ Open

BMJ Open is committed to open peer review. As part of this commitment we make the peer review history of every article we publish publicly available.

When an article is published we post the peer reviewers' comments and the authors' responses online. We also post the versions of the paper that were used during peer review. These are the versions that the peer review comments apply to.

The versions of the paper that follow are the versions that were submitted during the peer review process. They are not the versions of record or the final published versions. They should not be cited or distributed as the published version of this manuscript.

BMJ Open is an open access journal and the full, final, typeset and author-corrected version of record of the manuscript is available on our site with no access controls, subscription charges or pay-per-view fees (<http://bmjopen.bmj.com>).

If you have any questions on BMJ Open's open peer review process please email [info.bmjopen@bmj.com](mailto:info.bmjopen@bmj.com)

# BMJ Open

**Studying the Long-term Impact of Covid in Kids (SLICK).  
Healthcare use and costs in children and young people  
following community-acquired SARS-CoV-2 infection:  
protocol for an observational study using linked primary  
and secondary routinely collected healthcare data from  
England, Scotland and Wales.**

|                               |                                                                                                                                                                                                                                                                                                                                                                                                                                                                                                                                                                                                                                                                                                                                                                                                                                                                                                                                                                                                                                                                                                                                                                                                                                                                                                                                                                                                                                                                                                                                                                                                                                                                                                                                                                                                                                                                                                                                                                                                                                                                |
|-------------------------------|----------------------------------------------------------------------------------------------------------------------------------------------------------------------------------------------------------------------------------------------------------------------------------------------------------------------------------------------------------------------------------------------------------------------------------------------------------------------------------------------------------------------------------------------------------------------------------------------------------------------------------------------------------------------------------------------------------------------------------------------------------------------------------------------------------------------------------------------------------------------------------------------------------------------------------------------------------------------------------------------------------------------------------------------------------------------------------------------------------------------------------------------------------------------------------------------------------------------------------------------------------------------------------------------------------------------------------------------------------------------------------------------------------------------------------------------------------------------------------------------------------------------------------------------------------------------------------------------------------------------------------------------------------------------------------------------------------------------------------------------------------------------------------------------------------------------------------------------------------------------------------------------------------------------------------------------------------------------------------------------------------------------------------------------------------------|
| Journal:                      | <i>BMJ Open</i>                                                                                                                                                                                                                                                                                                                                                                                                                                                                                                                                                                                                                                                                                                                                                                                                                                                                                                                                                                                                                                                                                                                                                                                                                                                                                                                                                                                                                                                                                                                                                                                                                                                                                                                                                                                                                                                                                                                                                                                                                                                |
| Manuscript ID                 | bmjopen-2022-063271                                                                                                                                                                                                                                                                                                                                                                                                                                                                                                                                                                                                                                                                                                                                                                                                                                                                                                                                                                                                                                                                                                                                                                                                                                                                                                                                                                                                                                                                                                                                                                                                                                                                                                                                                                                                                                                                                                                                                                                                                                            |
| Article Type:                 | Protocol                                                                                                                                                                                                                                                                                                                                                                                                                                                                                                                                                                                                                                                                                                                                                                                                                                                                                                                                                                                                                                                                                                                                                                                                                                                                                                                                                                                                                                                                                                                                                                                                                                                                                                                                                                                                                                                                                                                                                                                                                                                       |
| Date Submitted by the Author: | 05-Apr-2022                                                                                                                                                                                                                                                                                                                                                                                                                                                                                                                                                                                                                                                                                                                                                                                                                                                                                                                                                                                                                                                                                                                                                                                                                                                                                                                                                                                                                                                                                                                                                                                                                                                                                                                                                                                                                                                                                                                                                                                                                                                    |
| Complete List of Authors:     | <p>Swann, Olivia; The University of Edinburgh Usher Institute of Population Health Sciences and Informatics, Centre for Medical Informatics; The University of Edinburgh Department of Child Life and Health,<br/>Lone, Nazir; The University of Edinburgh Usher Institute of Population Health Sciences and Informatics, Centre for Population Health Sciences<br/>Harrison, Ewen; The University of Edinburgh Usher Institute of Population Health Sciences and Informatics, Centre for Medical Informatics<br/>Tomlinson, Laurie; London School of Hygiene and Tropical Medicine Department of Non-communicable Disease Epidemiology<br/>Walker, Alex; University of Oxford Nuffield Department of Primary Care Health Sciences, The DataLab<br/>Seaborne, Michael; Swansea University, Centre for Population Health<br/>Pollock, Louisa; University of Glasgow Department of Child Health<br/>Farrell, James; The University of Edinburgh Usher Institute of Population Health Sciences and Informatics, Centre for Medical Informatics<br/>Hall, Peter; The University of Edinburgh MRC Institute of Genetics and Molecular Medicine, Institute of Cancer and Genetics<br/>Seth, Sohan; The University of Edinburgh School of Informatics<br/>Williams, Thomas; The University of Edinburgh Department of Child Life and Health,<br/>Preston, Jenny; University of Liverpool Faculty of Humanities and Social Sciences<br/>Ainsworth, Jennifer; University of Liverpool Faculty of Humanities and Social Sciences<br/>Semple, Freya; University of Glasgow School of Medicine Dentistry and Nursing<br/>Baillie, J; The University of Edinburgh The Roslin Institute, Division of Genetics and Genomics<br/>Katikireddi, Srinivasa; University of Glasgow, MRC/CSO Social &amp; Public Health Sciences Unit<br/>Akbari, Ashley; Swansea University Medical School; Swansea University Medical School, Health Data Research UK<br/>Lyons, Ronan; Swansea University Medical School<br/>Simpson, Colin; The University of Edinburgh, Usher Institute of</p> |

1  
2  
3  
4  
5  
6  
7  
8  
9  
10  
11  
12  
13  
14  
15  
16  
17  
18  
19  
20  
21  
22  
23  
24  
25  
26  
27  
28  
29  
30  
31  
32  
33  
34  
35  
36  
37  
38  
39  
40  
41  
42  
43  
44  
45  
46  
47  
48  
49  
50  
51  
52  
53  
54  
55  
56  
57  
58  
59  
60

|                  |                                                                                                                                                                                                                                                                                                                                                                                                                                                                                                                                                                                                                                                                                                                                                          |
|------------------|----------------------------------------------------------------------------------------------------------------------------------------------------------------------------------------------------------------------------------------------------------------------------------------------------------------------------------------------------------------------------------------------------------------------------------------------------------------------------------------------------------------------------------------------------------------------------------------------------------------------------------------------------------------------------------------------------------------------------------------------------------|
|                  | <p>Population Health Sciences and Informatics<br/> Semple, Malcolm G; NIHR Health Protection Research Unit in Emerging and Zoonotic Infections at University of Liverpool; Alder Hey Children's Hospital, Respiratory Paediatrics<br/> Goldacre, Ben; University of Oxford Nuffield Department of Primary Care Health Sciences, The DataLab<br/> Brophy, Sinead; Swansea University Medical School, Health Data Research UK<br/> Sheikh, Aziz; The University of Edinburgh Usher Institute of Population Health Sciences and Informatics<br/> Docherty, Annemarie; The University of Edinburgh Usher Institute of Population Health Sciences and Informatics, Centre for Medical Informatics; University of Edinburgh, Anaesthesia and Critical Care</p> |
| <p>Keywords:</p> | <p>COVID-19, Epidemiology &lt; INFECTIOUS DISEASES, Paediatric infectious disease &amp; immunisation &lt; PAEDIATRICS, HEALTH ECONOMICS</p>                                                                                                                                                                                                                                                                                                                                                                                                                                                                                                                                                                                                              |
|                  |                                                                                                                                                                                                                                                                                                                                                                                                                                                                                                                                                                                                                                                                                                                                                          |

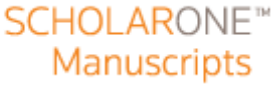

1  
2  
3  
4  
5 Studying the Long-term Impact of COVID-19 in Kids (SLICK).  
6  
7 Healthcare use and costs in children and young people  
8  
9 following community-acquired SARS-CoV-2 infection: protocol  
10  
11 for an observational study using linked primary and secondary  
12  
13 routinely collected healthcare data from England, Scotland and  
14  
15  
16  
17  
18  
19  
20  
21  
22  
23  
24  
25  
26  
27  
28  
29  
30  
31  
32  
33  
34  
35  
36  
37  
38  
39  
40  
41  
42  
43  
44  
45  
46  
47  
48  
49  
50  
51  
52  
53  
54  
55  
56  
57  
58  
59  
60

# Studying the Long-term Impact of COVID-19 in Kids (SLICK). Healthcare use and costs in children and young people following community-acquired SARS-CoV-2 infection: protocol for an observational study using linked primary and secondary routinely collected healthcare data from England, Scotland and Wales.

## Author list and affiliations

Olivia V. Swann <sup>1,2\*</sup>, Nazir Lone <sup>3</sup>, Ewen M. Harrison <sup>1</sup>, Laurie A. Tomlinson <sup>4</sup>, Alex J. Walker <sup>5</sup>, Michael Seaborne <sup>6</sup>, Louisa Pollock <sup>7</sup>, James Farrell <sup>1</sup>, Peter S Hall <sup>8</sup>, Sohan Seth <sup>9</sup>, Thomas C. Williams <sup>2</sup>, Jennifer Preston <sup>10</sup>, J. Samantha Ainsworth <sup>10</sup>, Freya F. Semple <sup>11</sup>, J. Kenneth Baillie <sup>12</sup>, Srinivasa V Katikireddi <sup>13</sup>, Ashley Akbari <sup>14</sup>, Ronan Lyons <sup>14</sup>, Colin R Simpson <sup>3,15</sup>, Malcolm G. Semple <sup>16</sup>, Ben Goldacre <sup>5</sup>, Sinead Brophy <sup>17</sup>, Aziz Sheikh <sup>3</sup> and Annemarie B. Docherty <sup>1</sup>

\* *Corresponding author*. Dr Olivia Swann, PhD, Clinical Lecturer in Paediatric Infectious Diseases, Centre for Medical Informatics, Usher Institute, University of Edinburgh, Edinburgh, UK.

Email: [Olivia.Swann@ed.ac.uk](mailto:Olivia.Swann@ed.ac.uk)

## Affiliations

1. Centre for Medical Informatics, Usher Institute, University of Edinburgh, Edinburgh, UK
2. Department of Child Life and Health, University of Edinburgh, Edinburgh, UK
3. Usher Institute, University of Edinburgh, Edinburgh, UK
4. Department of Non-Communicable Disease Epidemiology, London School of Hygiene and Tropical Medicine, London, United Kingdom.

- 1
- 2
- 3
- 4 5. The DataLab, Nuffield Department of Primary Care Health Sciences, University of
- 5 Oxford, Oxford, UK
- 6
- 7 6. Centre for Population Health, Swansea University, Swansea, UK
- 8
- 9 7. Child Health, School of Medicine, Dentistry and Nursing, University of Glasgow,
- 10 Glasgow, UK
- 11
- 12 8. Institute of Cancer and Genetics, University of Edinburgh, Edinburgh, UK
- 13
- 14 9. School of Informatics, University of Edinburgh, Edinburgh, UK
- 15
- 16 10. Faculty of Humanities & Social Sciences, University of Liverpool
- 17
- 18 11. School of Medicine, Dentistry and Nursing, University of Glasgow, Glasgow, UK
- 19
- 20 12. Roslin Institute, University of Edinburgh, Edinburgh, UK
- 21
- 22 13. MRC/CSO Social & Public Health Sciences Unit, University of Glasgow, Glasgow,
- 23 UK
- 24
- 25 14. Swansea University Medical School, Swansea University, Swansea, UK
- 26
- 27 15. School of Health, Faculty of Health, Victoria University of Wellington, Wellington,
- 28 New Zealand
- 29
- 30 16. NIHR Health Protection Research Unit in Emerging and Zoonotic Infections and
- 31 Institute of Infection, Veterinary and Ecological Sciences, Faculty of Health and Life
- 32 Sciences, University of Liverpool, Liverpool, UK
- 33
- 34 17. Health Data Research UK, Swansea University Medical School, Swansea University,
- 35 Swansea, UK.
- 36
- 37
- 38
- 39
- 40
- 41
- 42
- 43
- 44
- 45
- 46
- 47
- 48
- 49
- 50
- 51
- 52
- 53
- 54
- 55
- 56
- 57
- 58
- 59
- 60

## Abstract

### *Introduction*

Severe acute respiratory syndrome coronavirus 2 (SARS-CoV-2) infection rarely causes hospitalisation in children and young people (CYP), but mild or asymptomatic infections are common. Persistent symptoms following infection have been reported in CYP but subsequent healthcare use is unclear. We aim to describe healthcare use in CYP following community-acquired SARS-CoV-2 infection and identify those at risk of ongoing healthcare needs.

### *Methods and analysis*

We will use anonymised individual-level, population-scale national data linking demographics, comorbidities, primary and secondary care use, mortality and SARS-CoV-2 test data between 01/01/2019-01/05/2022. Analyses will use Trusted Research Environments: OpenSAFELY in England, Secure Anonymised Information Linkage (SAIL Databank) in Wales and Early Pandemic Evaluation and Enhanced Surveillance of COVID-19 (EAVE-II) in Scotland. CYP aged  $\geq 4$  and  $< 18$  years who underwent SARS-CoV-2 reverse transcription polymerase chain reaction (RT-PCR) testing between 01/01/20 and 01/05/21 and those untested CYP will be examined.

The primary outcome measure is cumulative healthcare cost over 12 months following SARS-CoV-2 testing, stratified into primary or secondary care, and physical or mental healthcare. We will estimate the burden of healthcare use attributable to SARS-CoV-2 infections in the 12 months after testing using a matched cohort study of RT-PCR positive, negative or untested CYP matched on testing date, with adjustment for confounders. We will identify factors associated with higher healthcare needs in the 12 months following SARS-CoV-2 infection using an unmatched cohort of RT-PCR positive CYP. Multivariable logistic regression and machine learning approaches will identify risk factors for high healthcare use and characterise patterns of healthcare use post infection.

### *Ethics and dissemination*

This study was approved by the South-Central Oxford C Health Research Authority Ethics Committee (13/SC/0149). Findings will be pre-printed and published in peer-reviewed

1  
2  
3  
4  
5  
6  
7  
8  
9  
10  
11  
12  
13  
14  
15  
16  
17  
18  
19  
20  
21  
22  
23  
24  
25  
26  
27  
28  
29  
30  
31  
32  
33  
34  
35  
36  
37  
38  
39  
40  
41  
42  
43  
44  
45  
46  
47  
48  
49  
50  
51  
52  
53  
54  
55  
56  
57  
58  
59  
60

journals. Analysis code and code-lists will be available through public GitHub repositories and OpenCodelists with meta-data via HDR-UK Innovation Gateway.

For peer review only

## Strengths and limitations of this study

### Strengths:

1. Objective, direct examination of clinician-recorded healthcare use by children and young people (CYP) post SARS-CoV-2 infection with population-wide coverage of all CYP <18 years in Scotland and Wales and approximately 4.8 million CYP in England.
2. Reduction in selection and response biases present in much of the existing literature examining persistent symptoms post SARS-CoV-2 infection in CYP.

### Limitations:

1. Lack of access to SARS-CoV-2 lateral flow testing results may result in misattribution of SARS-CoV-2 status in patients when reverse transcription polymerase chain reaction (RT-PCR) testing was not performed.
2. Access to health services is presumed to be available for anyone who needed it, but this may have been reduced by local healthcare policies and patient health-seeking behaviour at different points during the pandemic.
3. Owing to the time needed for 12 months of follow up, this study will focus on healthcare use after infection with wildtype and Alpha variants of SARS-CoV-2, which may differ from Delta and Omicron.



## Introduction

Severe acute respiratory syndrome coronavirus 2 (SARS-CoV-2) causes the disease COVID-19, with adults being more severely affected than children throughout the pandemic<sup>1</sup>. While hospitalisation with SARS-CoV-2 is rare in children and young people (CYP)<sup>2</sup>, infection is common, with up to 70% (95% CI 68-71) of 5-14 year olds estimated to have been infected with SARS-CoV-2 in the UK by December 2021<sup>3</sup>. Whilst research on COVID-19 in CYP has focused on index hospitalisations and deaths, this acute view means we have not established what the additional healthcare needs are for the majority of CYP after mild or asymptomatic SARS-CoV-2 infection. There is also little information on the changes to healthcare use in children with co-morbidities who may be at risk of exacerbations (for example asthma). The large numbers of CYP infected with SARS-CoV-2 in the UK means that even a small increase in healthcare use in this population could substantially impact on healthcare services. Being asymptomatic with initial infection does not guarantee against developing subsequent illness from SARS-CoV-2, for example CYP who are asymptomatic with their initial SARS-CoV-2 infection can develop Multisystem Inflammatory Syndrome in Children (MIS-C) two to eight weeks later<sup>4</sup>. Whilst this complication is extremely rare (approximately 3 cases per 10,000 infections<sup>5</sup>), it underlines the need to include CYP who are initially asymptomatic from SARS-CoV-2 infection when examining subsequent healthcare use.

A wide variety of persistent symptoms have been reported in CYP following SARS-CoV-2 infection with studies varying in design and quality (reviewed in<sup>6</sup>). Most reports have used a questionnaire or clinic-based approach to symptom reporting, often after hospitalisation with COVID-19 or in patients self-identifying as having Long-COVID, introducing significant potential sources of bias. Whilst adult studies have reported increased risk of outpatient healthcare use in the six months following SARS-CoV-2 infection<sup>7</sup>, there is a lack of studies examining healthcare use in CYP following SARS-CoV-2 infection at a population level. Using routinely collected anonymised electronic health record (EHR) data at an individual-level, population-scale matched by SARS-CoV-2 RT-PCR status to examine healthcare use after SARS-CoV-2 infection in CYP will significantly reduce many of the biases seen in studies to date.

1  
2  
3  
4 In addition to traditional epidemiological approaches, machine learning methods are also  
5 proving increasingly important in the analysis of large routinely collected healthcare datasets  
6 in SARS-CoV-2<sup>8</sup>. Using machine learning to identify clusters of patients with similar  
7 healthcare trajectories provides a complementary approach to traditional epidemiology to  
8 identify patients at risk of high healthcare use post infection. A combination of approaches  
9 would establish the long-term healthcare use attributable to SARS-CoV-2 in CYP, which is  
10 essential both for tailoring individual care for patients at risk of high healthcare use post  
11 infection and informing health service and vaccination planning.  
12  
13  
14  
15  
16  
17  
18  
19  
20

## 21 Aims

22  
23 We aim to establish the patterns and burden of healthcare use in CYP attributable to  
24 community-acquired SARS-CoV-2 infection and identify those CYP at risk of high or ongoing  
25 healthcare needs in England, Scotland and Wales.  
26  
27  
28  
29  
30

## 31 Objectives

32 We will:

- 33 1. Describe the background healthcare use in CYP before and during the pandemic.
- 34 2. Compare healthcare use in CYP in the 12 months after testing positive, negative or  
35 not being tested for SARS-CoV-2 by RT-PCR to estimate burden of healthcare use  
36 attributable to SARS-CoV-2.
- 37 3. Identify factors associated with higher healthcare use (including having co-  
38 morbidities) in the 12 months following SARS-CoV-2 infection.  
39  
40  
41  
42  
43  
44  
45  
46  
47  
48  
49  
50  
51  
52  
53  
54  
55  
56  
57  
58  
59  
60

## Methods

### Study period

The period covered by the study will span 01/01/2019 to 01/05/22 and focus on SARS-CoV-2 infections until 01/05/21. This study period was chosen to provide 12 months of follow up data for CYP infected to the end of the second wave of SARS-CoV-2 in the UK (end of April 2021 <sup>9</sup>) as well as those testing negative or not tested. Inclusion of the time frame 01/01/19 to 01/01/21 will provide at least a year of data on pre-pandemic data on healthcare use for each CYP.

### Study design

The study will comprise three main approaches; a descriptive graphical analysis addressing Objective 1 (background healthcare use before and during the pandemic), a matched cohort study addressing Objective 2 (estimating healthcare use post SARS-CoV-2 infection) and an unmatched cohort study addressing Objective 3 (identifying factors associated with higher healthcare needs post SARS-CoV-2 infection).

### Study Population

The study population will vary with objective:

#### **Inclusion criteria (all objectives):**

- Registered with a General Practitioner (GP) in Scotland (includes all general practices), Wales or England (The Phoenix Partnership (TPP) a group of GP practices with a unified electronic patient-record system covering approximately 34% of practices in England <sup>10</sup>)

#### **Exclusion criteria (all objectives):**

- Positive index SARS-CoV-2 RT-PCR test performed after 7 days in hospital (to exclude nosocomial infections <sup>11</sup>)
- CYP with discrepant SARS-CoV-2 RT-PCR results on the same date

#### **Objective 1- Objective-specific inclusion criteria**

- Age ≥4 years and <18 years on 01/01/19 (pre-pandemic period)
- Age ≥4 years and <18 years on 01/01/20 (pandemic period)
- Age ≥4 years and <18 years on 01/01/21 (pandemic period)

### Objective 2 - Objective-specific inclusion criteria

- Underwent SARS-CoV-2 PCR testing (or untested but matched to CYP who had been tested) between 01/01/20 and 01/05/21
- Age  $\geq 4$  and  $< 18$  years on date of testing / matching
- At least 12 months of healthcare data available both before and after SARS-CoV-2 PCR test / date of matching if not tested
- No previous positive SARS-CoV-2 PCR test recorded

### Objective 3 - Objective-specific inclusion criteria

- Positive SARS-CoV-2 RT-PCR test between 01/01/20 and 01/05/21
- Age  $\geq 4$  and  $< 18$  years on date of testing
- At least 12 months of healthcare data available both before and after SARS-CoV-2 PCR test
- No previous positive SARS-CoV-2 PCR test recorded

### Data sources and validation

Data will be held securely and analyses conducted within nation-specific Trusted Research Environments (TREs): OpenSAFELY in England <sup>12</sup>, Secure Anonymised Information Linkage (SAIL Databank <sup>13</sup>) in Wales and the Early Pandemic Evaluation and Enhanced Surveillance of COVID-19 (EAVE-II) platform <sup>14</sup> within Public Health Scotland in Scotland.

Deterministic and probabilistic linking of datasets will be carried out via Community Health Index (CHI) number in Scotland and by National Health Service (NHS) number in England and Wales. NHS and CHI numbers are unique identifiers used in all health-care contacts across the NHS <sup>15</sup>. Datasets contributing to each country's final database are described in *Supplementary Table 1* with data flow diagrams in *Supplementary Figures A-C*. In addition to the study period outlined, data from birth will also be examined to identify comorbidities, including common chronic childhood conditions <sup>16</sup>. In the event of missing data, these will be supplemented by information for that CYP in linked datasets. All variables will be checked for patterns of missingness and implausible values and a log maintained for reasons where records are excluded from analysis. In cases where an analysis variable has high levels of missingness, alternative variables which are closely related may be considered as a proxy for these missing data. Depending on the cause ascertained for missing variables, we will

1  
2  
3  
4 consider imputation.  
5

6 As PIMS-TS is a new disease, ICD-10 coding was not introduced until November 2020.

7  
8 Admission will be considered due to PIMS-TS if occurring between 01/02/20 – 01/11/20 and  
9  
10 coded as Kawasaki disease, toxic shock syndrome or systemic inflammatory response  
11  
12 (proxies for PIMS-TS) or if admitted after 01/11/20 and coded as PIMS-TS <sup>17</sup>. National  
13  
14 PIMS-TS databases (available in Scotland and Wales) will be used for sensitivity analyses.

15 The major data sources for each variable are detailed in *Table 1*.  
16  
17  
18  
19  
20  
21  
22  
23  
24  
25  
26  
27  
28  
29  
30  
31  
32  
33  
34  
35  
36  
37  
38  
39  
40  
41  
42  
43  
44  
45  
46  
47  
48  
49  
50  
51  
52  
53  
54  
55  
56  
57  
58  
59  
60

Table 1. Groupings of variables by source (adapted from <sup>18</sup>)

|                                   | Variable                                                                                    | Data source                          |                                        |                                    |
|-----------------------------------|---------------------------------------------------------------------------------------------|--------------------------------------|----------------------------------------|------------------------------------|
|                                   |                                                                                             | England<br>(OpenSAFELY<br>)          | Scotland<br>(EAVE-II)                  | Wales<br>(SAIL)                    |
| <b>Demographics</b>               | Sex                                                                                         | TPP                                  | EAVE-II                                | WDSW/WLGP                          |
|                                   | Age                                                                                         | TPP                                  | EAVE-II                                | WDSW/WLGP                          |
|                                   | Ethnicity                                                                                   | TPP                                  | EAVE-II                                | CENW/NCCH                          |
| <b>Socio-economic</b>             | IMD                                                                                         | TPP                                  | EAVE-II                                | WDSW                               |
| <b>Place of residence</b>         | Health board / STP,<br>urban rural index                                                    | TPP                                  | EAVE-II                                | WDSW                               |
| <b>Accommodation type</b>         | Private or social housing                                                                   | <i>NA</i>                            | EAVE-II                                | CENW                               |
| <b>Comorbidities</b>              | Chronic childhood<br>conditions                                                             | TPP, SUS<br>APCS, SUS<br>OPA, ISARIC | EAVE-II,<br>SMR00/01/04/<br>06, ISARIC | CYFI, BREC,<br>WCSU,<br>WLGP, PEDW |
|                                   | SARS-CoV-2 shielding<br>list                                                                | TPP                                  | EAVE-II                                | CVSP                               |
| <b>SARS-CoV-2<br/>vaccination</b> | Vaccine (type, date)                                                                        | TPP                                  | TVMT                                   | CVVD                               |
| <b>Laboratory tests</b>           | RT-PCR SARS-CoV-2<br>test (date and result)                                                 | SGSS                                 | COVID-testing                          | PATD                               |
|                                   | Viral variant                                                                               | SGSS                                 | COG UK                                 | CVSD/PATD                          |
| <b>Secondary care</b>             | ED contact                                                                                  | SUS ECDS                             | A+E Datamart                           | EDDD/EDDS                          |
|                                   | Outpatient clinic contact                                                                   | SUS OPS                              | SMR00                                  | OPDW                               |
|                                   | Hospital admission                                                                          | SUS APCS                             | SMR01/04                               | PEDW                               |
|                                   | Admission ICD-10 code                                                                       | SUS APCS                             | SMR                                    | PEDW                               |
|                                   | Level of care                                                                               | SUS / ISARIC                         | SMR / ISARIC                           | PEDW/CCDS                          |
|                                   | Length of stay                                                                              | SUS / ISARIC                         | SMR / ISARIC                           | PEDW/CCDS                          |
|                                   | PIMS-TS                                                                                     | SUS / ISARIC                         | SMR / ISARIC                           | PEDW/CCDS                          |
| <b>Primary care</b>               | In-hours contact                                                                            | TPP                                  | EAVE-II                                | WLGP                               |
|                                   | Community prescriptions                                                                     | TPP                                  | EAVE-II / PIS                          | WDDS                               |
| <b>Unscheduled care</b>           | NHS 111 contact                                                                             | <i>NA</i>                            | NHS 24                                 | NHSO                               |
|                                   | Ambulance contact                                                                           | <i>NA</i>                            | SAS                                    | WASD/NHSO                          |
|                                   | GP out of hours contact                                                                     | <i>NA</i>                            | GP OOH                                 | NHSO                               |
| <b>Mortality</b>                  | Death (all cause, COVID-<br>19 main cause or <28<br>days of positive SARS-<br>CoV-2 RT-PCR) | ONS deaths                           | NRS deaths                             | ONS deaths /<br>ADDE               |

|                 |                                                     |                      |                      |                      |
|-----------------|-----------------------------------------------------|----------------------|----------------------|----------------------|
| <b>Symptoms</b> | Presenting symptoms in CYP admitted with SARS-CoV-2 | ISARIC (subset only) | ISARIC (subset only) | ISARIC (subset only) |
|-----------------|-----------------------------------------------------|----------------------|----------------------|----------------------|

**Abbreviations:** **EAVE-II**=Early Pandemic Evaluation and Enhanced Surveillance of COVID-19; **SAIL**: Secure Anonymised Information Linkage; **IMD**=Index of Multiple Deprivation; **STP**=Sustainability and Transformation Partnership (STP, geographical areas configured for regional reorganisation in England), **ED**= Emergency Department; **ICD-10**=International Classification of Diseases 10th Revision; **NHS**=National Health Service; **GP**=general practice; **PIMS-TS**= Paediatric multisystem inflammatory syndrome temporally associated with COVID-19; **TPP**=The Phoenix Partnership (GP group); **SUS**=Secondary Use Services; **APCS**=Admitted patient care statistics; **OPA**=Outpatient attendances; **ECDS**=Emergency care datasets; **SGSS**=Second Generation Surveillance System; **ISARIC** =International Severe Acute Respiratory and emerging Infection Consortium / COVID-19 Clinical Information Network; **ONS**: Office for National Statistics; **SMR**=Scottish Morbidity Record; **TMVT**=Turas Vaccination Management Tool; **COG-UK**=Centre of Genomics United Kingdom; **PIS**= Prescribing Information System; **SAS**=Scottish Ambulance Service; **OOH**=Out Of Hours; **NRS**=National Records of Scotland; **WLGP**=Welsh Longitudinal General Practice; **PEDW**=Patient Episode Database for Wales; **ADDE**=Annual District Death Extract; **CCDS**=Critical Care Data Source; **CDDS**=COVID-19 Consolidated Deaths; **CENW**=Office of National Statistics Census; **CTTP**=COVID-19 Test Trace & Protect; **CVLF**=COVID-19 Lateral Flow; **CVSP**=COVID-19 Shielded People; **CVVD**=COVID-19 Vaccine Data; **EDDD**=Emergency Department Dataset Daily; **EDDS**=Emergency Department Dataset; **ICCD**=Intensive Care National Audit & Research Centre (ICNARC)-COVID only admissions; **ICNC**=Intensive Care National Audit & Research Centre (ICNARC); **MIDS**=Maternity Indicators Dataset; **NCCH**=National Community Child Health; **NHSO**=NHS 111 Call data; **OPDW**=Outpatient Dataset for Wales; **OPRD**=Outpatient Referral Dataset; **PATD**=Pathology Data (COVID-19 daily); **RTTD**=Referral to Treatment Times Dataset; **WASD**=Welsh Ambulance Service Dataset; **WCSU**=Welsh Cancer Incidence Surveillance Unit; **WDDS**=Welsh Dispensing Dataset; **WDSD**=Welsh Demographic Service Dataset. **NA**=Not available.

## Exposure

The exposure of interest is diagnosis of SARS-CoV-2 infection, defined as a positive RT-PCR test result. The date of exposure is defined as the date of the positive RT-PCR test result.

## Outcomes

The primary outcome measure will be cumulative NHS healthcare costs over the 12 months following SARS-CoV-2 testing. This will provide an overarching measure that is reflective of healthcare resource use, which is expressed on a monetary scale that is common between the three nations and common to all types of activity. Activity will only contribute to the primary outcome measure if it is quantifiable from data in all three nations. Healthcare costs will be broken down into budget-holder perspectives; secondary care (critical care/inpatient/outpatient/A&E) and primary care (face-to face or telephone in-hours primary care activity). A sensitivity analysis of unscheduled care (e.g. NHS 24, ambulance, GP OOH) will be undertaken for the nations where this data is available (Scotland and Wales). To ensure comparability, unit costs will be assigned from a common country (England) using Personal Social Services Research Unit costs with a common base year<sup>19</sup>.

Secondary outcomes will constitute units of healthcare activity, quantifiable as counts over time or rates, that can be quantified to a common definition between the three nations, e.g. inpatient episodes by specialty or primary care appointments. Both primary and secondary outcomes will be stratified into predominantly physical or mental healthcare based on the primary reason for admission / attendance. The reason for healthcare use will also be further explored (e.g. by body system / healthcare speciality).



## Statistical analyses

Analyses will be replicated across the three nations in each respective TRE.

### *Objective 1*

*Describe the background healthcare use in CYP before and during the pandemic.*

Significant, dynamic changes in both healthcare access and healthcare-seeking behaviour have occurred across the course of the pandemic to date. As such, exploration of background healthcare use in CYP before and during the pandemic will help contextualise subsequent analyses. A descriptive, graphical analysis will be undertaken. Healthcare use (represented as cost) will be plotted for the period of 01/01/19 to 01/05/22 for all CYP. These data will be stratified by variables including age, sex, nation of residence, type of healthcare (primary or secondary care) and RT-PCR status (RT-PCR positive, RT-PCR negative and never tested). Reasons for healthcare visits will also be explored.

### *Objective 2*

*Compare healthcare use in CYP in the 12 months after testing positive, negative or not being tested for SARS-CoV-2 by RT-PCR to estimate the burden of healthcare use attributable to SARS-CoV-2.*

This analysis will focus on estimating the burden of CYP healthcare use which is attributable to SARS-CoV-2 infection in the 12 months after infection, whereas individual factors associated with healthcare use after infection will be explored in Objective 3.

A prospective matched cohort study will be undertaken. Matching will be undertaken for date of RT-PCR test with iterative widening bands as necessary. This will account for availability of testing, access to healthcare, variation in incidence rates, emergence of viral variants, changes in SARS-CoV-2 treatment and systematically different characteristics in the tested population (compared to the untested population) as the pandemic progressed. Ten RT-PCR test negative non-hospitalised control CYP will be matched without replacement for every RT-PCR positive case. Confounding will then be minimised by propensity score development and / or adjustment including the following variables: age, sex, SARS-CoV-2 vaccination status at the time of index RT-PCR test (considered vaccinated if  $\geq 3$  weeks since first dose), geographical region (health board / Sustainability and Transformation

1  
2  
3 Partnership (STP)) to account for regional differences in RT-PCR testing and availability of  
4 healthcare, previous healthcare contact (primary or secondary), chronic conditions, number  
5 of previous SARS-CoV-2 tests, socioeconomic status (quintiles of relevant national  
6 deprivation measure: Scottish Index of Multiple Deprivation (SIMD), Welsh Index of Multiple  
7 Deprivation (WIMD) and Lower layer Super Output Area (LSOA)) and urban-rural index.  
8  
9

10  
11  
12  
13 Factors are associated with being brought for RT-PCR testing (e.g. public awareness and  
14 testing availability) may be different from those of exposure to SARS-CoV-2. A directed  
15 acyclic graph of factors associated with SARS-CoV-2 RT-PCR testing and healthcare use to  
16 consider in model building is shown in *Supplementary Figure D*.  
17  
18  
19

20  
21 In contrast to adults, the median hospital length of stay due to SARS-CoV-2 in CYP is short,  
22 previously reported in the UK as 2 days (IQR 1-4) <sup>20</sup>. As such, follow up will start 14 days  
23 after testing positive for SARS-CoV-2 on RT-PCR which will enable us to look back and  
24 further stratify the exposure by SARS-CoV-2 severity (i.e. community care, hospitalisation or  
25 critical care).  
26  
27  
28  
29

30  
31 CYP in the control group may subsequently test positive for SARS-CoV-2 by RT-PCR. If this  
32 occurs during the RT-PCR testing period of interest (01/01/20 - 01/05/21) they will become a  
33 case and follow-up commenced for 12 months (with appropriate matches for the date of the  
34 positive RT-PCR). If the control tests positive after 01/05/21 (i.e. after the RT-PCR testing  
35 period of interest), they will be censored and will not become a case. A graphical illustration  
36 of the potential CYP paths for this analysis is shown in *Figure 1*.  
37  
38  
39  
40  
41

42  
43 As CYP who are brought for RT-PCR testing are systematically different to those who are  
44 not brought <sup>21</sup>, a sensitivity analysis will be undertaken to compare the RT-PCR positive  
45 cohort against the population of CYP who have never tested positive (i.e. both RT-PCR  
46 negative and untested CYP), hereafter "population controls." RT-PCR positive CYP will be  
47 matched to ten population controls who were not hospitalised on the date of their matched  
48 case's RT-PCR <sup>7</sup>. Confounding will then be minimised as described above. A graphical  
49 illustration of the potential CYP paths for this analysis is shown in *Supplementary Figure E*.  
50  
51  
52  
53  
54

55  
56 The proportion of CYP with SARS-CoV-2 infection but without a positive RT-PCR (e.g.  
57 tested by lateral flow or untested asymptomatic cases) has increased across the pandemic <sup>3</sup>.  
58  
59  
60

1  
2  
3  
4 As such, we will conduct quantitative bias analyses for unmeasured confounding using  
5 different estimates of undetected SARS-CoV-2 infection across the study period.  
6  
7

### 8 *Objective 3*

9 *Identify factors associated with higher healthcare use (including having co-morbidities) in the*  
10 *12 months following SARS-CoV-2 infection.*  
11  
12

13  
14 Both regression and machine learning approaches will be undertaken to examine healthcare  
15 costs in the SARS-CoV-2 RT-PCR positive cohort. A multivariable regression model will be  
16 constructed with covariates including demographics (age, sex, socioeconomic status, urban-  
17 rural Index and health board / STP, pre-existing health status (chronic comorbidities,  
18 previous health care resource use, number of dispensed prescriptions, vaccination status  
19 and number of previous PCR tests), markers of severity of illness (community, hospital or  
20 intensive care within 14 days of index RT-PCR positive result) and PIMS-TS. In order to  
21 examine CYP admitted due to SARS-CoV-2 (rather than those with incidental SARS-CoV-2  
22 infection and another reason for admission), a sensitivity analysis will be performed  
23 excluding CYP with index SARS-CoV-2 RT-PCR undertaken 72 hours or less before an  
24 elective admissions, day case procedure or undertaken at any time during hospitalisation for  
25 trauma or emergency surgery.  
26  
27  
28  
29  
30  
31  
32  
33  
34  
35

36 We will then explore machine learning approaches to identify patterns of healthcare use over  
37 time following SARS-CoV-2 infection and explore which covariates are associated with high  
38 healthcare use. We will categorise CYP into groups based on their trajectories (i.e. patterns  
39 of healthcare use). Both total healthcare cost and types of healthcare (secondary care and  
40 scheduled primary care) will be considered. This will be done using three approaches: a)  
41 latent growth mixture model of aggregated healthcare uses over a month<sup>22</sup>, b) Bayesian  
42 categorical time series clustering of daily service uses of different types<sup>23</sup>, and c) centroid  
43 based clustering with dynamic time warping distance of smoothed healthcare use cost<sup>24</sup>. By  
44 modelling this time series of healthcare use, we will group patients into clusters with similar  
45 patterns, e.g., one cluster may correspond to CYP who use general practices on a frequent  
46 basis but are not admitted to hospital while another cluster may belong to CYP who do not  
47 use general practices but attend outpatient clinics regularly.  
48  
49  
50  
51  
52  
53  
54  
55  
56  
57  
58  
59  
60

1  
2  
3 After identifying CYP clusters, covariates (including demographics, comorbidities and  
4 previous healthcare use) will be examined to identify any factors which may associated with  
5 higher healthcare needs post SARS-CoV-2. These analyses will be stratified by  
6 hospitalisation (i.e. hospital admission within 14 days of index RT-PCR positive result) or  
7 community care and by diagnosis of PIMS-TS. A sensitivity analysis excluding CYP with  
8 presumed incidental SARS-CoV-2 will be carried out as detailed above.  
9  
10  
11  
12  
13

### 14 15 Sensitivity analysis

16  
17 It is likely that the majority of healthcare costs will be experienced within the first three  
18 months of SARS-CoV-2 infection <sup>25</sup>. Following on from Objectives 2 and 3, we will extend the  
19 end date of the cohort to three months before the date of data extraction, and examine  
20 healthcare use in the three months following infection with SARS-CoV-2. This will enable us  
21 to examine healthcare use with later Delta (B.1.617.2) and Omicron (B.1.1.529) variants.  
22  
23  
24  
25

### 26 27 Anticipated limitations

28  
29 Whilst this protocol has been carefully developed to reduce bias, there are anticipated  
30 limitations due to constraints of the data. Given the study period, it will also only be possible  
31 to examine the annual healthcare costs following infections with wildtype or Alpha (B.1.1.7)  
32 SARS-CoV-2 variant infections which may not be the same as after Delta (B.1.617.2) or  
33 Omicron (B.1.1.529) variant infections. The datasets included do not contain information on  
34 SARS-CoV-2 lateral flow testing results which could result in misattribution of SARS-CoV-2  
35 status in patients if RT-PCR testing was not performed. This is likely to particularly affect the  
36 later months of the study period where the highly transmissible Omicron variant was  
37 widespread and government advice no longer advocated RT-PCR following a positive lateral  
38 flow test in some situations <sup>26</sup>. In addition, the study will presume that healthcare services  
39 were available for anyone who needed them, but this may have been affected by local  
40 healthcare policies and patient health-seeking behaviour at different points during the  
41 pandemic.  
42  
43  
44  
45  
46  
47  
48  
49  
50  
51  
52  
53  
54  
55  
56  
57  
58  
59  
60

## Patient and Public Involvement

This proposal was developed together with the Liverpool Generation-R Young Person's Advisory Group (YPAG), a group of engaged CYP aged between 12 and 21 years with lived experience of the SARS-CoV-2 pandemic. A member of the YPAG is also a co-investigator and member of the steering committee, helping ensure the study is delivered appropriately and that decisions about study implementation are guided by meaningful PPIE input. We will undertake two interactive workshops with the YPAG to co-create educational materials for use in schools/science fairs. We will also use these workshops to discuss challenges regarding misinformation about SARS-CoV-2, strategies to correctly share information to young people using social media and the use of routine data in research. The YPAG have named the study – “Studying the Long-term Impact of COVID-19 in Kids (SLICK)” and chosen the logo (*Supplementary Figure F*).

## Ethics and Dissemination

This study was approved by the South Central - Oxford C - Health Research Authority Research Ethics Committee, approval reference number 13/SC/0149.

The EAVE-II dataset was approved by the National Research Ethics Service Committee, South East Scotland 02 (REC number: 12/SS/0201) and the Public Benefit and Privacy Panel for Health and Social Care (reference number: 1920-0279).

OpenSAFELY is a secure, transparent, open-source software platform for analysis of electronic health records data with all activity publicly logged. The establishment of the OpenSAFELY platform was approved by the Health Research Authority (REC reference 20/LO/0651). The OpenSAFELY research platform adheres to the data protection principles of the UK Data Protection Act 2018 and the EU General Data Protection Regulation (GDPR) 2016.

The Welsh Con-COV research platform was created to determine demographic, socioeconomic and clinical risk factors for infection and mortality of COVID-19, to measure impact of COVID-19 on healthcare utilisation and long-term health, and to enable the evaluation of natural experiments of policy intervention<sup>27</sup>. The project (SAIL 0911) was

1  
2  
3 approved by the independent Information Governance Review Panel (IGRP). Investigation of  
4 the long-term healthcare burden of COVID-19 in children falls under this remit thus Con-  
5 COV is approved for use. Approved researchers are also able to access additional  
6 information within Con-COV that has been brought to SAIL under the Digital Economy Act  
7 (DEA) to Accredited Researchers via the SAIL Databank <sup>28</sup>.  
8  
9  
10  
11  
12

13 Guidelines for the Strengthening the Reporting of Observational Studies in Epidemiology  
14 (STROBE) and REporting of studies Conducted using Observational Routinely-collected  
15 Data (RECORD) (via the COVID-19 extension) will be followed to report findings from this  
16 study. Findings will be presented at international conferences and published in peer-  
17 reviewed journals. Reports will also be prepared for policy makers. All analysis code will be  
18 made available through a public GitHub repository. In addition, a methods guide to  
19 producing harmonised metrics of paediatric healthcare costs across the three nations will be  
20 developed with associated code. Code lists to map and classify long term health conditions  
21 in paediatric populations in routine primary and secondary care datasets will be made  
22 available through OpenCodelists ([www.opencodelists.org](http://www.opencodelists.org)). Meta-data will be made available  
23 via the HDR-UK Innovation Gateway.  
24  
25  
26  
27  
28  
29  
30  
31  
32  
33

## 34 Funding

35  
36 This research is part of the Data and Connectivity National Core Study, led by Health Data  
37 Research UK in partnership with the Office for National Statistics and funded by UK  
38 Research and Innovation (grant ref MC\_PC\_20058). This work was also supported by The  
39 Alan Turing Institute via 'Towards Turing 2.0' EPSRC Grant Funding. The grant period spans  
40 01/11/21 to 30/09/22.  
41  
42  
43  
44  
45  
46  
47  
48

## 49 Acknowledgements

50 The cohorts included in this work have been funded separately as follows:

51  
52 ISARIC / CO-CIN is supported by grants from the National Institute for Health Research  
53 (award CO-CIN-01) and the Medical Research Council (grant MC\_PC\_19059) and by the  
54 National Institute for Health Research Health Protection Research Unit (NIHR HPRU) in  
55 Emerging and Zoonotic Infections at University of Liverpool in partnership with Public Health  
56  
57  
58  
59  
60

1  
2  
3  
4 England (PHE), in collaboration with Liverpool School of Tropical Medicine and the  
5 University of Oxford (NIHR award 200907), Wellcome Trust and Department for International  
6 Development (215091/Z/18/Z), and the Bill and Melinda Gates Foundation (OPP1209135).  
7  
8

9  
10 EAVE II is funded by the Medical Research Council [MR/R008345/1] and supported by the  
11 Scottish Government. This work is supported by BREATHE—The Health Data Research  
12 Hub for Respiratory Health [MC\_PC\_19004]. BREATHE is funded through 10 the UK  
13 Research and Innovation Industrial Strategy Challenge Fund and delivered through Health  
14 Data Research UK.  
15  
16  
17  
18

19  
20 OpenSAFELY is jointly funded by UKRI [COV0076;MR/V015737/1] NIHR and Asthma UK-  
21 BLF and the Longitudinal Health and Wellbeing strand of the National Core Studies  
22 programme. The OpenSAFELY data science platform is funded by the Wellcome Trust. BG's  
23 work on better use of data in healthcare more broadly is currently funded in part by: the  
24 Wellcome Trust, NIHR Oxford Biomedical Research Centre, NIHR Applied Research  
25 Collaboration Oxford and Thames Valley, the Mohn-Westlake Foundation; all DataLab staff  
26 are supported by BG's grants on this work.  
27  
28  
29  
30  
31  
32

33  
34 SAIL Databank is funded by Health Care Research Wales and the analysis of this work was  
35 also funded by Health Care Research Wales through the Centre for Population Health and  
36 through Health Data Research Wales/N.Ireland, which receives its funding from HDR UK Ltd  
37 (HDR-9006) funded by the UK Medical Research Council, Engineering and Physical  
38 Sciences Research Council, Economic and Social Research Council, Department of Health  
39 and Social Care (England), Chief Scientist Office of the Scottish Government Health and  
40 Social Care Directorates, Health and Social Care Research and Development Division  
41 (Welsh Government), Public Health Agency (Northern Ireland), British Heart Foundation  
42 (BHF) and the Wellcome Trust. This work was supported by the Con-COV team funded by  
43 the Medical Research Council (grant number: MR/V028367/1).  
44  
45  
46  
47  
48  
49  
50

51  
52 Funders had no role in the study design, collection, analysis, and interpretation of data; in  
53 the writing of the report; and in the decision, submit the article for publication.  
54  
55  
56  
57  
58  
59  
60



## Author's contributions

OS, NIL, EMH, PSH, SB, MGS, SB, BG and ABD were responsible for conception of this project. OVS, LAT, AJW, MJS, JF, BG, SB and ABD will be responsible for data curation. OVS, NIL, EMH, LAT, AJW, MJS, JF, SS and ABD will be undertaking the analysis for this protocol. OVS, NIL, EMH, JKB, MGS, BG, SB, AS and ABD were responsible for securing funding for this project or its constituent cohorts. OVS, NIL, EMH, LAT, AJW, MJS, LP, JF, PSH, SS, JP, JSA, FFS, SVK, CRS, MGS, SB and ABD designed the analysis plan. OVS and ABD are providing administrative support to this project. LAT, AJW, MS, JP, JA, FFS, JKB, AA, RL, MGS, BG, SB, AS and ABD are providing resources to this project. EMH, LAT, AJW, MJS, SS and BG are providing software for this project. MGS, AS and ABD are providing supervision. EMH, LAT, AJW, MJS, JF and SS will be responsible for data validation. OVS, EMH, AJW, MJS and SS are responsible for data visualisation. OVS, NIL, EMH, LAT, AJW, MJS, LP, PSH, SS and ABD wrote the original draft of this protocol and all authors were involved in the review and editing of this manuscript.

## Competing Interests

**OVS** reports an institutional payment from HDR-UK/Alan Turing for work on this study. **LAT** reports institutional contracts with UKRI, NIHR, MRC, institutional consulting fees from Bayer, support to attend MHRA meetings and unpaid membership of two non-industry funded trial advisory committees. **MS** reports an institutional payment from HDR-UK/Alan Turing for work on this study. **CRS** reports institutional grants from MBIE, HRC and MRC. **SVK** reports funding from NRS, MRC and the Scottish Government Chief Scientist Office. He was co-chair of the Scottish Government's Expert Reference Group on Ethnicity and COVID-19 and a member of the UK Scientific Advisory Group on Emergencies subgroup on ethnicity. **MGS** reports grants from NIHR, MRC and Health Protection Research Unit in Emerging & Zoonotic Infections, University of Liverpool. He also reports a role as Independent external and non-remunerated member of Pfizer's External Data Monitoring Committee for their mRNA vaccine program. He is Chair of Infectious Disease Scientific Advisory Board for Integrum Scientific LLC, Greensboro, NC, USA and director of MedEx Solutions Ltd. He reports minority stock ownership for Integrum Scientific LLC, Greensboro,



1  
2  
3  
4 NC, USA and majority stock ownership for MedEx Solutions Ltd. He also reports a gift from  
5 Chiesi Farmaceutici SPA to his institution of a clinical trial investigational medicinal product  
6 without encumbrance and distribution of same to trial sites. He is also a non-remunerated  
7 independent member of HMG UK Scientific Advisory Group for Emergencies (SAGE,  
8 COVID-19 Response) and HMG UK New Emerging Respiratory Virus Threats Advisory  
9 Group (NERVTAG). **SB** has received an institutional payment from HDR-UK/Alan Turing  
10 funding UOE Ref: 11563729 for work on this study. She also reports institutional payments  
11 from MRC, Welsh Government and NIHR. She is a member of the Population and Systems  
12 Medicine MRC board. **AS** reports an institutional payment from HDR-UK/Alan Turing and  
13 research grants for EAVE II and BREATHE Hub. He also reports non-remunerated positions  
14 on AstraZeneca's Thrombotic Thrombocytopenic Taskforce and Scottish and UK  
15 Government Advisory Committees. RAL is a member of the Welsh Government COVID-19  
16 Technical Advisory Group. **BG** has received research funding from HDRUK, the Laura and  
17 John Arnold Foundation, the Wellcome Trust, the NIHR Oxford Biomedical Research Centre,  
18 the NHS National Institute for Health Research School of Primary Care Research, the Mohn-  
19 Westlake Foundation, the Good Thinking Foundation, the Health Foundation, and the World  
20 Health Organisation; he also receives personal income from speaking and writing for lay  
21 audiences on the misuse of science.

22  
23  
24  
25  
26  
27  
28  
29  
30  
31  
32  
33  
34  
35  
36  
37  
38 **AJW, NIL, EMH, LP, JF, PSH, SS, AA, TCW, JP, JSA, FFS, JKB and ABD** report no  
39 competing interests.  
40  
41  
42  
43  
44  
45  
46  
47  
48  
49  
50  
51  
52  
53  
54  
55  
56  
57  
58  
59  
60

## References

1. Docherty AB, Harrison EM, Green CA, et al. Features of 20 133 UK patients in hospital with covid-19 using the ISARIC WHO Clinical Characterisation Protocol: prospective observational cohort study. *BMJ*, 369. Epub ahead of print 22 May 2020. DOI: 10.1136/bmj.m1985.
2. Swann OV, Holden KA, Turtle L, et al. Clinical characteristics of children and young people admitted to hospital with covid-19 in United Kingdom: prospective multicentre observational cohort study. *BMJ*, 370. Epub ahead of print 27 August 2020. DOI: 10.1136/bmj.m3249.
3. Birrel P, Blake J, van Leeuwen E, et al. Report on Nowcasting and Forecasting - 9th December 2021. *MRC Biostatistics Unit*, <https://www.mrc-bsu.cam.ac.uk/nowcasting/report-on-nowcasting-and-forecasting-9th-december-2021/> (accessed 9 February 2022).
4. Whittaker E, Bamford A, Kenny J, et al. Clinical Characteristics of 58 Children With a Pediatric Inflammatory Multisystem Syndrome Temporally Associated With SARS-CoV-2. *JAMA*. Epub ahead of print 8 June 2020. DOI: 10.1001/jama.2020.10369.
5. Payne AB, Gilani Z, Godfred-Cato S, et al. Incidence of Multisystem Inflammatory Syndrome in Children Among US Persons Infected With SARS-CoV-2. *JAMA Netw Open* 2021; 4: e2116420.
6. Behnood SA, Shafran R, Bennett S, et al. *Persistent Symptoms Following SARS-CoV-2 Infection Among Children and Young People: A Meta-Analysis of Controlled and Uncontrolled Studies*. SSRN Scholarly Paper ID 3940260, Rochester, NY: Social Science Research Network. Epub ahead of print 12 October 2021. DOI: 10.2139/ssrn.3940260.
7. Al-Aly Z, Xie Y, Bowe B. High-dimensional characterization of post-acute sequelae of COVID-19. *Nature* 2021; 594: 259–264.
8. Zoabi Y, Deri-Rozov S, Shomron N. Machine learning-based prediction of COVID-19 diagnosis based on symptoms. *Npj Digit Med* 2021; 4: 1–5.
9. Office for National Statistics. Coronavirus (COVID-19) Infection Survey technical article: waves and lags of COVID-19 in England, June 2021, <https://www.ons.gov.uk/peoplepopulationandcommunity/healthandsocialcare/conditionsa>

- 1  
2  
3  
4 nndiseases/articles/coronaviruscovid19infectionsurveytechnicalarticle/wavesandlagsofco  
5 vid19inenglandjune2021 (2021, accessed 17 December 2021).  
6  
7  
8 10. Kontopantelis E, Stevens RJ, Helms PJ, et al. Spatial distribution of clinical computer  
9 systems in primary care in England in 2016 and implications for primary care electronic  
10 medical record databases: a cross-sectional population study. *BMJ Open* 2018; 8:  
11 e020738.  
12  
13  
14  
15 11. Surveillance definitions for COVID-19. *European Centre for Disease Prevention and*  
16 *Control*, <https://www.ecdc.europa.eu/en/covid-19/surveillance/surveillance-definitions>  
17 (accessed 17 December 2021).  
18  
19  
20  
21 12. Williamson EJ, Walker AJ, Bhaskaran K, et al. OpenSAFELY: factors associated with  
22 COVID-19 death in 17 million patients. *Nature* 2020; 584: 430–436.  
23  
24  
25 13. Lyons RA, Jones KH, John G, et al. The SAIL databank: linking multiple health and  
26 social care datasets. *BMC Med Inform Decis Mak* 2009; 9: 3.  
27  
28  
29 14. Simpson CR, Robertson C, Vasileiou E, et al. Early Pandemic Evaluation and Enhanced  
30 Surveillance of COVID-19 (EAVE II): protocol for an observational study using linked  
31 Scottish national data. *BMJ Open* 2020; 10: e039097.  
32  
33  
34  
35 15. Zhu Y, Matsuyama Y, Ohashi Y, et al. When to conduct probabilistic linkage vs.  
36 deterministic linkage? A simulation study. *J Biomed Inform* 2015; 56: 80–86.  
37  
38  
39 16. Fraser LK, Murtagh FEM, Sheldon T, et al. Health of mothers of children with a life-  
40 limiting condition: a protocol for comparative cohort study using the Clinical Practice  
41 Research Datalink. *BMJ Open* 2020; 10: e034024.  
42  
43  
44  
45 17. Ward JL, Harwood R, Smith C, et al. Risk factors for PICU admission and death among  
46 children and young people hospitalized with COVID-19 and PIMS-TS in England during  
47 the first pandemic year. *Nat Med* 2021; 1–8.  
48  
49  
50  
51 18. Adeloye D, Katikireddi SV, Woolford L, et al. Uptake, effectiveness and safety of COVID-  
52 19 vaccines in children and young people in Scotland: protocol for early pandemic  
53 evaluation and enhanced surveillance of COVID-19 (EAVE II). *J Glob Health*.  
54  
55  
56  
57 19. Curtis LA, Burns A. *Unit Costs of Health & Social Care 2020*. PSSRU, University of Kent,  
58 <https://www.pssru.ac.uk/project-pages/unit-costs/unit-costs-2020/> (2020, accessed 9  
59 December 2021).  
60

- 1  
2  
3  
4 20. Swann OV, Pollock L, Holden KA, et al. Comparison of children and young people  
5 admitted with SARS-CoV-2 across the UK in the first and second pandemic waves:  
6 prospective multicentre observational cohort study. 2021; 2021.09.14.21263567.  
7  
8
- 9  
10 21. Green MA, García-Fiñana M, Barr B, et al. Evaluating social and spatial inequalities of  
11 large scale rapid lateral flow SARS-CoV-2 antigen testing in COVID-19 management: An  
12 observational study of Liverpool, UK (November 2020 to January 2021). *Lancet Reg*  
13 *Health - Eur* 2021; 6: 100107.  
14  
15
- 16  
17 22. Jung T, Wickrama K a. S. An Introduction to Latent Class Growth Analysis and Growth  
18 Mixture Modeling. *Soc Personal Psychol Compass* 2008; 2: 302–317.  
19  
20
- 21  
22 23. Frühwirth-Schnatter S, Pamminger C. Model-based clustering of categorical time series.  
23 *Bayesian Anal* 2010; 5: 345–368.  
24  
25
- 26  
27 24. Franses PH, Wiemann T. Intertemporal Similarity of Economic Time Series: An  
28 Application of Dynamic Time Warping. *Comput Econ* 2020; 56: 59–75.  
29  
30
- 31  
32 25. Magnusson K, Skyrud KD, Suren P, et al. Healthcare use in 700 000 children and  
33 adolescents for six months after covid-19: before and after register based cohort study.  
34 *BMJ* 2022; 376: e066809.  
35  
36
- 37  
38 26. People with a positive lateral flow test no longer required to take confirmatory PCR test.  
39 *GOV.UK*, [https://www.gov.uk/government/news/people-with-a-positive-lateral-flow-test-](https://www.gov.uk/government/news/people-with-a-positive-lateral-flow-test-no-longer-required-to-take-confirmatory-pcr-test)  
40 [no-longer-required-to-take-confirmatory-pcr-test](https://www.gov.uk/government/news/people-with-a-positive-lateral-flow-test-no-longer-required-to-take-confirmatory-pcr-test) (accessed 18 January 2022).  
41  
42
- 43  
44 27. Lyons J, Akbari A, Torabi F, et al. Understanding and responding to COVID-19 in Wales:  
45 protocol for a privacy-protecting data platform for enhanced epidemiology and evaluation  
46 of interventions. *BMJ Open* 2020; 10: e043010.  
47  
48
- 49  
50 28. Jones KH, Ford DV, Jones C, et al. A case study of the Secure Anonymous Information  
51 Linkage (SAIL) Gateway: a privacy-protecting remote access system for health-related  
52 research and evaluation. *J Biomed Inform* 2014; 50: 196–204.  
53  
54  
55  
56  
57  
58  
59  
60

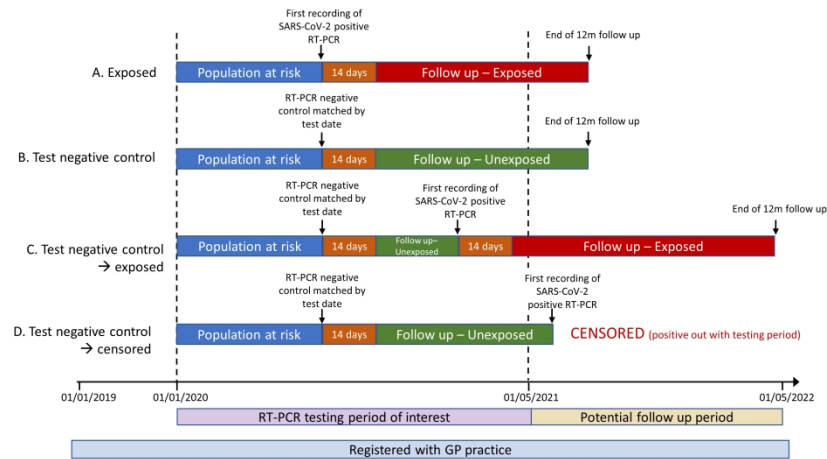

Figure 1. Graphical illustrations of potential study scenarios with test negative controls.

Example A: Positive SARS-CoV-2 RT-PCR case.

Individual A is followed-up from 14 days after SARS-CoV-2 infection for 12 months.

Examples B-D: Test negative controls.

Individual B is matched to an individual with SARS-CoV-2 infection and followed-up from 14 days after matching for 12 months.

Individual C is matched to an individual with SARS-CoV-2 infection and followed-up from 14 days after matching until they are first recorded with SARS-CoV-2 infection themselves during the RT-PCR testing period of interest. At this point they are censored from further follow-up as a test negative comparator and followed-up as an exposed case from 14 days after infection for 12 months with appropriate matches for the date of positive RT-PCR.

Individual D is matched to an individual with SARS-CoV-2 infection and followed-up from 14 days after matching until they are first recorded with SARS-CoV-2 infection themselves. As this occurs after the RT-PCR testing period of interest, they are censored from further follow-up as an unexposed comparator.

338x190mm (300 x 300 DPI)

Studying the Long-term Impact of COVID-19 in Kids (SLICK).  
Healthcare use and costs in children and young people following  
community-acquired SARS-CoV-2 infection: protocol for an  
observational study using linked primary and secondary routinely  
collected healthcare data from England, Scotland and Wales.

## Supplementary Information

*Supplementary Table 1 – Datasets available and Trusted Research Environments*

| Country  | Trusted Research Environment | Datasets and linkages                                                                                                                                                                                                                                                                                                                                                                                                                                                                                                                                                                                                                                                                         |
|----------|------------------------------|-----------------------------------------------------------------------------------------------------------------------------------------------------------------------------------------------------------------------------------------------------------------------------------------------------------------------------------------------------------------------------------------------------------------------------------------------------------------------------------------------------------------------------------------------------------------------------------------------------------------------------------------------------------------------------------------------|
| Scotland | Scottish National Safe Haven | <b>SMR00</b> – Outpatient appointments and attendances<br><b>SMR01</b> – General acute inpatient and day case<br><b>SMR04</b> – Mental health inpatient and day case<br><b>SMR06</b> – Scottish cancer registry<br><b>COVID Tests</b> – Laboratory SARS-CoV-2 tests<br><b>Prescribing Information System</b> – Community prescriptions<br><b>Accident and Emergency Datamart</b><br><b>GP out of hours</b><br><b>Scottish Ambulance Service</b><br><b>NHS24 calls</b><br><b>NRS Deaths</b><br><b>NRS Infant deaths</b><br><b>EAVE II</b> – Scheduled and unscheduled primary care<br><b>ISARIC4C/CO-CIN</b><br><b>COGUK</b> – SARS-CoV-2 variant<br><b>TVMT</b> – SARS-Cov-2 vaccination data |
| England  | OpenSAFELY                   | <b>TPP</b> - Primary Care<br><b>SGSS COVID testing data</b><br><b>ONS death certificates</b> – available from 2019-02-01<br><b>SUS APCS</b> (inpatient hospital) – available from 2016-04-01<br><b>SUS OPA</b> (outpatient hospital) – available from 2019-04-01<br><b>SUS ECDS</b> (emergency care) – available from 2017-10-01<br><b>ISARIC4C/CO-CIN</b>                                                                                                                                                                                                                                                                                                                                    |
| Wales    | SAIL                         | <b>ConCOV</b> - Wales Multimorbidity Cohort (WMC) - COVID-19<br><b>WLGP</b> – Primary care<br><b>PEDW</b> – Secondary care (inpatient & day case)<br><b>ADDE</b> – ONS mortality data<br><b>CCDS</b> – Critical care<br><b>CDDS</b> – Consolidate deaths from COVID-19                                                                                                                                                                                                                                                                                                                                                                                                                        |

|  |  |                                                                                                                                                                                                                                                                                                                                                                                                                                                                                                                                                                                                                                                                                                                                                                                                                                                                                                                                                                                                                                                                                                                                                                                                                                                                                                   |
|--|--|---------------------------------------------------------------------------------------------------------------------------------------------------------------------------------------------------------------------------------------------------------------------------------------------------------------------------------------------------------------------------------------------------------------------------------------------------------------------------------------------------------------------------------------------------------------------------------------------------------------------------------------------------------------------------------------------------------------------------------------------------------------------------------------------------------------------------------------------------------------------------------------------------------------------------------------------------------------------------------------------------------------------------------------------------------------------------------------------------------------------------------------------------------------------------------------------------------------------------------------------------------------------------------------------------|
|  |  | <p><b>CENW</b> – Census 2011</p> <p><b>CTTP</b> – COVID-19 test, trace and protect</p> <p><b>CVLF</b> – COVID-19 lateral flow tests</p> <p><b>CVSP</b> – COVID-19 shielded people</p> <p><b>CVVD</b> – COVID-19 vaccines</p> <p><b>EDDD</b> – Emergency department (daily)</p> <p><b>EDDS</b> – Emergency department</p> <p><b>ICCD</b> – intensive care national audit (COVID only admissions)</p> <p><b>ICNC</b> – intensive care national audit</p> <p><b>MIDS</b> – Maternity initial screening and birth</p> <p><b>NCCH</b> – National community child health (maternity, childbirth, etc)</p> <p><b>NHSO</b> – NHS 111, out of hours</p> <p><b>OPDW</b> – Outpatients</p> <p><b>OPRD</b> – Outpatient referrals</p> <p><b>PATD</b> – COVID-19 lab tests</p> <p><b>RTTD</b> – Referral to treatment times</p> <p><b>WASD</b> – Welsh ambulance service</p> <p><b>WCSU</b> – Welsh cancer incidence surveillance unit</p> <p><b>WDDS</b> – Welsh prescription dispensing</p> <p><b>WDSO</b> – Individuals registered with GP, addresses/household information</p> <p><b>CRCS</b> – Children in care or receiving support register</p> <p><b>CYFI</b> – Cystic Fibrosis register</p> <p><b>BREC</b> – Register of all children in Wales with type 1 diabetes</p> <p><b>ISARIC4C/CO-CIN</b></p> |
|--|--|---------------------------------------------------------------------------------------------------------------------------------------------------------------------------------------------------------------------------------------------------------------------------------------------------------------------------------------------------------------------------------------------------------------------------------------------------------------------------------------------------------------------------------------------------------------------------------------------------------------------------------------------------------------------------------------------------------------------------------------------------------------------------------------------------------------------------------------------------------------------------------------------------------------------------------------------------------------------------------------------------------------------------------------------------------------------------------------------------------------------------------------------------------------------------------------------------------------------------------------------------------------------------------------------------|

**Abbreviations:** **SMR:** Scottish Morbidity Record, **NRS:** National Records of Scotland **EAVE-II:** Early Pandemic Evaluation and Enhanced Surveillance of COVID-19, **ISARIC/CO-CIN:** International Severe Acute Respiratory and emerging Infection Consortium / COVID-19 Clinical Information Network, **COGUK:** COVID-19 Genomics UK Consortium, **TMVT:** Turas Vaccination Management Tool, **NHS:** National Health Service, **TPP:** The Phoenix Partnership (GP group), **SGSS:** Second Generation Surveillance System, **ONS:** Office for National Statistics, **SUS:** Secondary Use Services, **APCS:** Admitted patient care statistics, **OPA:** Outpatient attendances, **ECDS:** Emergency care datasets, **SAIL:** Secure Anonymised Information Linkage, **WLGP:** Welsh Longitudinal General Practice, **PEDW:** Patient Episode Database for Wales, **ADDE:** Annual District Death Extract, **CCDS:** Critical Care Data Source, **CDDS:** COVID-19 Consolidated Deaths, **CENW:** Office of National Statistics Census, **CTTP:** COVID-19 Test, Trace & Protect, **CVLF:** COVID-19 Lateral Flow, **CVSP:** COVID-19 Shielded People, **CVVD:** COVID-19 Vaccine Data, **EDDD:** Emergency Department Dataset Daily, **EDDS:** Emergency Department Dataset, **ICCD:** Intensive Care National Audit & Research Centre (ICNARC) - COVID only admissions, **ICNC:** Intensive Care National Audit & Research Centre (ICNARC), **MIDS:** Maternity Indicators Dataset, **NCCH:** National Community Child Health, **NHSO:** NHS 111 Call data, **OPDW:** Outpatient Dataset for Wales, **OPRD:** Outpatient Referral Dataset, **PATD:** Pathology Data (COVID-19 daily), **RTTD:** Referral to Treatment Times Dataset, **WASD:** Welsh Ambulance Service Dataset, **WCSU:** Welsh Cancer Incidence Surveillance Unit, **WDDS:** Welsh Dispensing Dataset, **WDSO:** Welsh Demographic Service Dataset.



Supplementary Figure A – Dataflow diagram for Wales

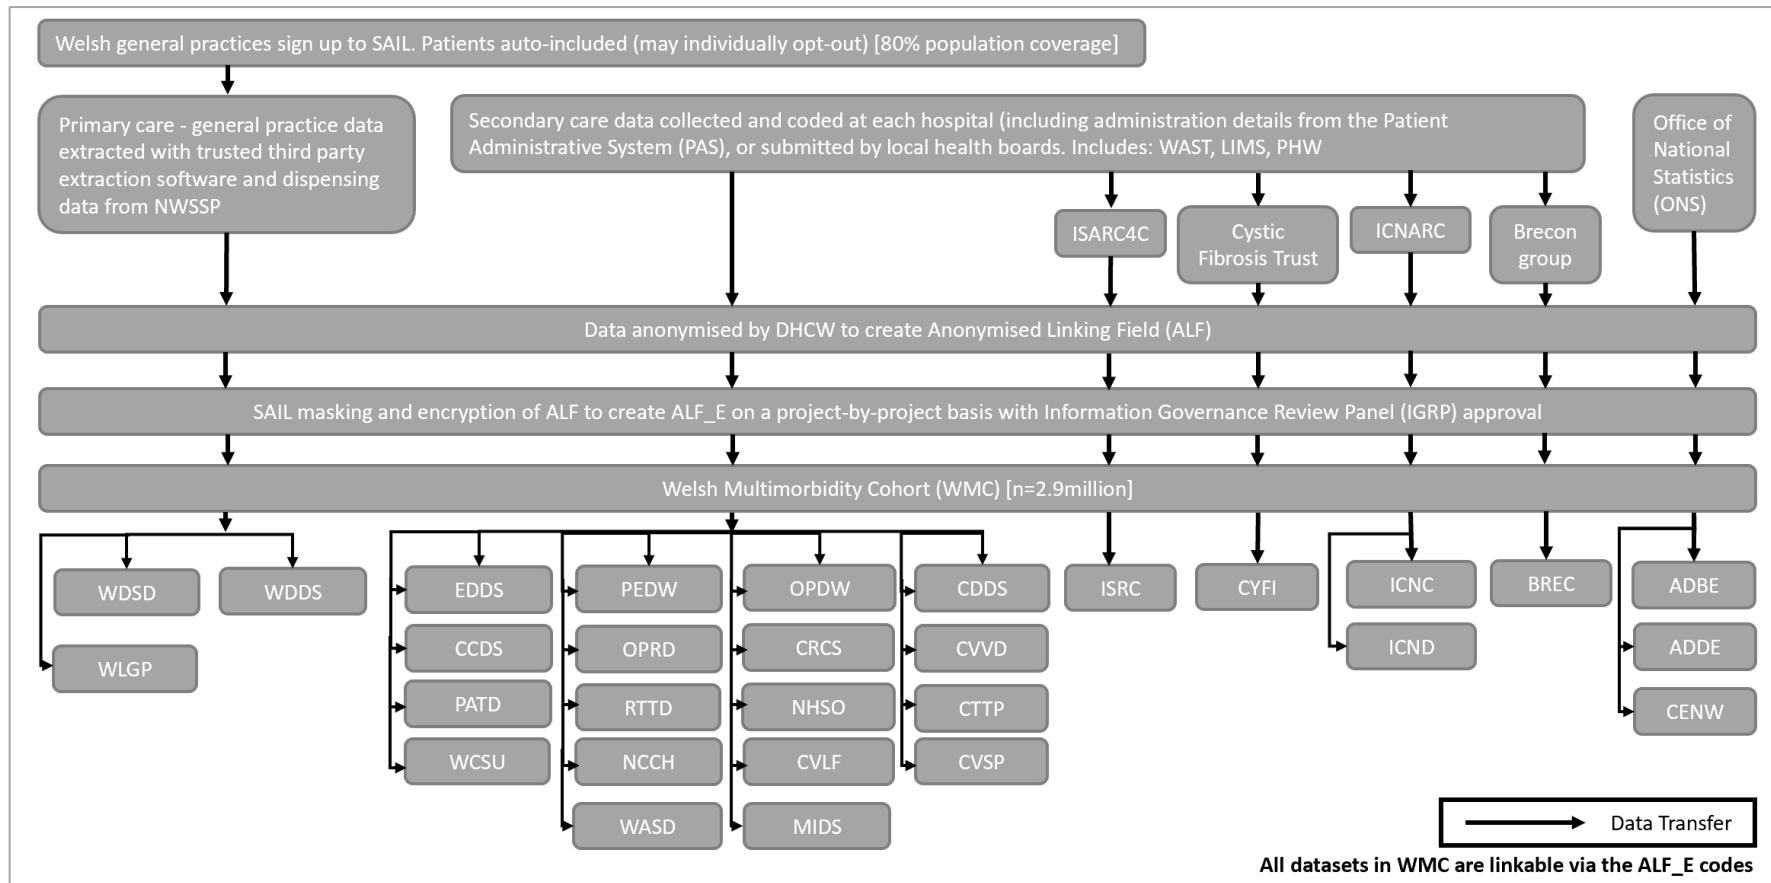

**Abbreviations:** SAIL: Secure Anonymised Information Linkage, WLGP: Welsh Longitudinal General Practice, PEDW: Patient Episode Database for Wales, ADDE: Annual District Death Extract, BREC: Brecon Cohort (Children with type 1 diabetes register), CCDS: Critical Care Data Source, CDDS: COVID-19 Consolidated Deaths, CENW: Office of National Statistics Census, CRCS: Children Receiving Care & Support Services, CTPP: COVID-19 Test, Trace & Protect, CVLF: COVID-19 Lateral Flow, CVSP: COVID-19 Shielded People, CVVD: COVID-19 Vaccine Data, CYFI: Cystic Fibrosis Register, EDDS: Emergency Department Dataset, ICCD: Intensive Care National Audit & Research Centre (ICNARC) - COVID only admissions, ICNC: Intensive Care National Audit & Research Centre (ICNARC), ISRC: International Severe Acute Respiratory & Emerging Infection Consortium, ISARIC4C: International Severe Acute Respiratory & Emerging Infection Consortium (Coronavirus Clinical Characterisation Consortium), MIDS: Maternity Indicators Dataset, NCCH: National Community Child Health, NHSO: NHS 111 Call data, OPDW: Outpatient Dataset for Wales, OPRD: Outpatient Referral Dataset, PATD: Pathology Data (COVID-19 daily), RTTD: Referral to Treatment Times Dataset, WASD: Welsh Ambulance Service Dataset, WCSU: Welsh Cancer Incidence Surveillance Unit, WDDS: Welsh Dispensing Dataset, WSDS: Welsh Demographic Service Dataset.



Supplementary Figure B – Dataflow diagram for Scotland

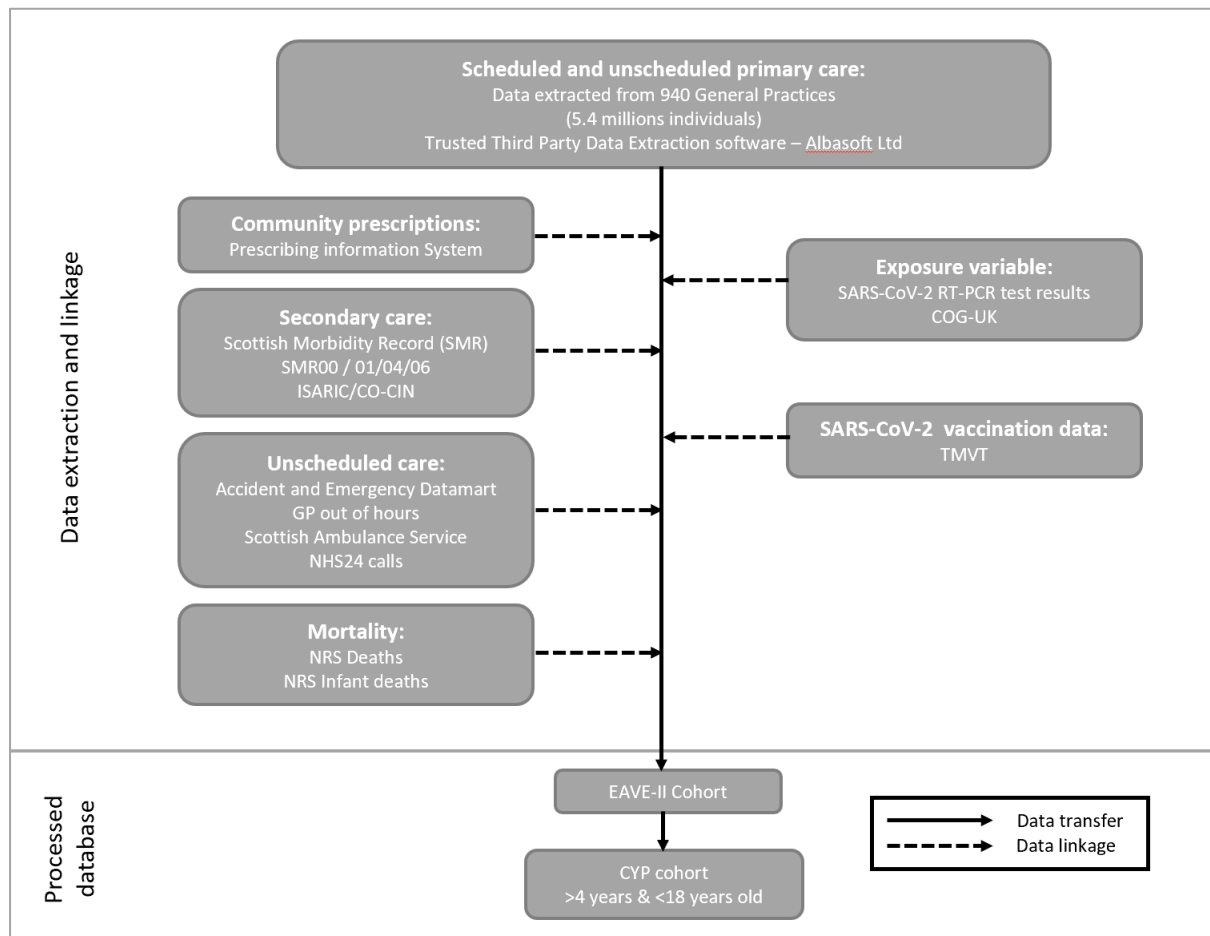

**Abbreviations:** *ISARIC/CO-CIN*: International Severe Acute Respiratory and emerging Infection Consortium / COVID-19 Clinical Information Network, *GP*: general practice; *NHS*: National Health Service, *NRS*: National Records of Scotland; *RT-PCR*: reverse transcription polymerase chain reaction, *TMVT*: Turas Vaccination Management Tool; *COG-UK*: Centre of Genomics United Kingdom, *CYP*: children and young people

Supplementary Figure C – Dataflow diagram for England

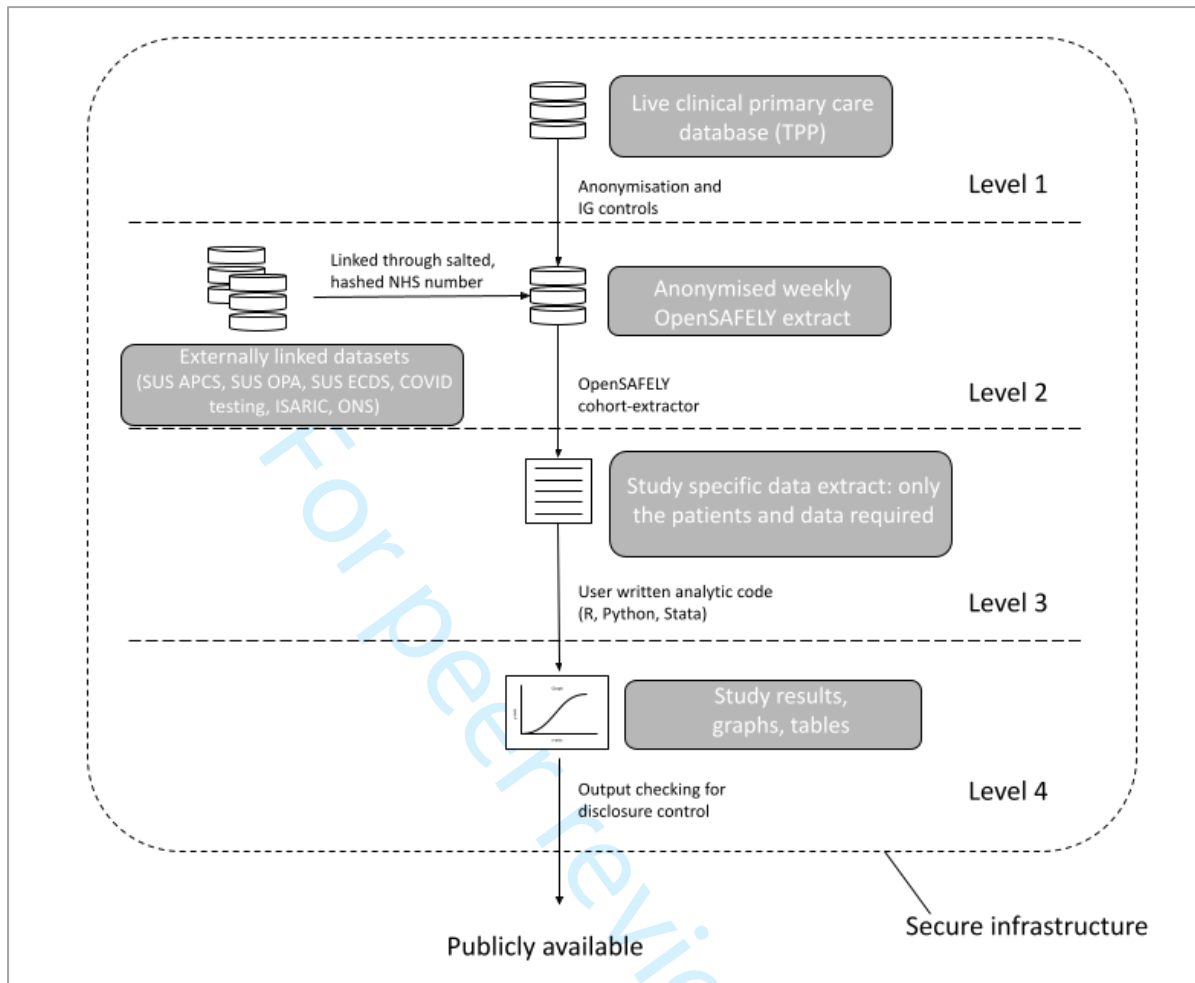

**Abbreviations:** *TPP:* The Phoenix Partnership (GP group), *SGSS:* Second Generation Surveillance System, *ONS:* Office for National Statistics, *SUS:* Secondary Use Services, *APCS:* Admitted patient care statistics, *OPA:* Outpatient attendances, *ECDS:* Emergency care datasets, *ONS:* Office for National Statistics.

Supplementary Figure D– Directed acyclic graph factors associated with SARS-CoV-2 RT-PCR testing and healthcare use

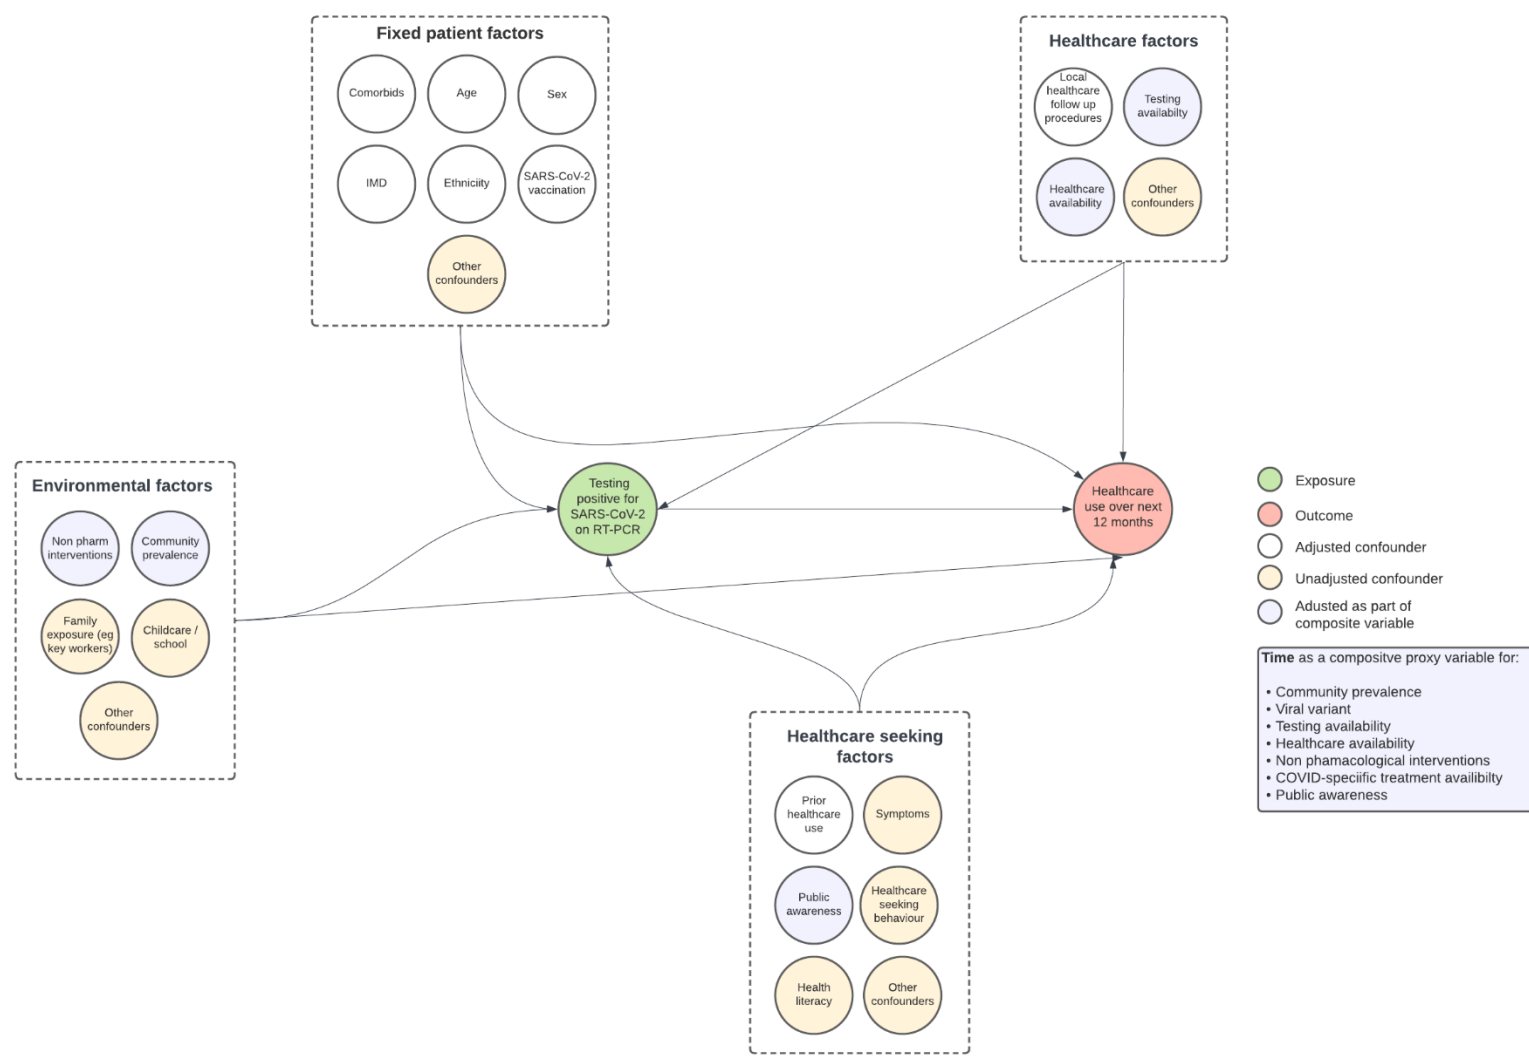

1  
2  
3  
4  
5  
6  
7  
8  
9  
10  
11  
12  
13  
14  
15  
16  
17  
18  
19  
20  
21  
22  
23  
24  
25  
26  
27  
28  
29  
30  
31  
32  
33  
34  
35  
36  
37  
38  
39  
40  
41  
42  
43  
44  
45  
46

Supplementary Figure E. Graphical illustration of potential study scenarios with population controls (Objective 2 sensitivity analysis)

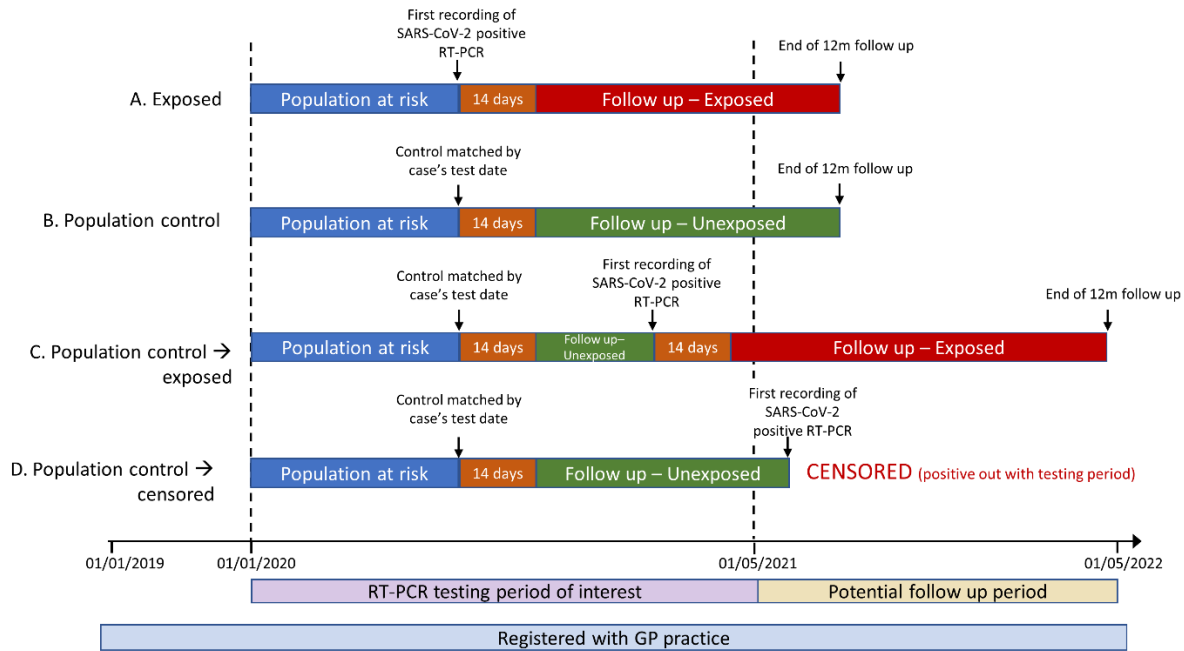

**Example A: Positive SARS-CoV-2 RT-PCR case.** Individual A is followed-up from 14 days after SARS-CoV-2 infection for 12 months. **Examples B-D: Population controls.** Individual B is matched to an individual with SARS-CoV-2 infection and followed-up from 14 days after matching for 12 months. Individual C is matched to an individual with SARS-CoV-2 infection and followed-up from 14 days after matching until they are first recorded with SARS-CoV-2 infection themselves during the RT-PCR testing period of interest. At this point they are censored from further follow-up as a test negative comparator and followed-up as an exposed case from 14 days after infection for 12 months with appropriate matches for the date of positive RT-PCR. Individual D is matched to an individual with SARS-CoV-2 infection and followed-up from 14 days after matching until they are first recorded with SARS-CoV-2 infection themselves. As this occurs after the RT-PCR testing period of interest, they are censored from further follow-up as an unexposed comparator.

1  
2  
3  
4  
5  
6  
7  
8  
9  
10  
11  
12  
13  
14  
15  
16  
17  
18  
19  
20  
21  
22  
23  
24  
25  
26  
27  
28  
29  
30  
31  
32  
33  
34  
35  
36  
37  
38  
39  
40  
41  
42  
43  
44  
45  
46  
47  
48  
49  
50  
51  
52  
53  
54  
55  
56  
57  
58  
59  
60

*Supplementary Figure F – Logo for SLICK study*

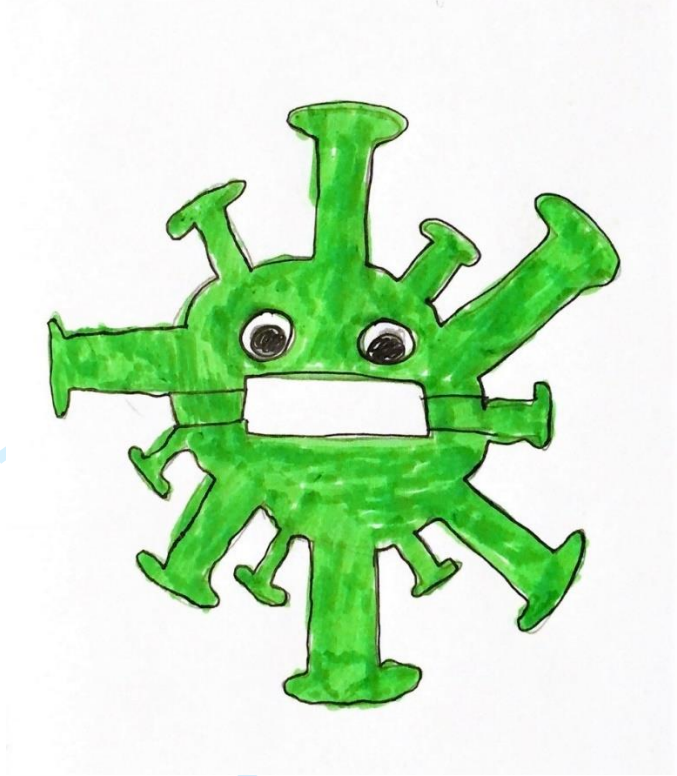

Designed by Georgia Langley, aged 11

Review only

# BMJ Open

**Studying the Long-term Impact of Covid in Kids (SLICK).  
Healthcare use and costs in children and young people  
following community-acquired SARS-CoV-2 infection:  
protocol for an observational study using linked primary  
and secondary routinely collected healthcare data from  
England, Scotland and Wales.**

|                               |                                                                                                                                                                                                                                                                                                                                                                                                                                                                                                                                                                                                                                                                                                                                                                                                                                                                                                                                                                                                                                                                                                                                                                                                                                                                                                                                                                                                                                                                                                                                                                                                                                                                                                                                                                                                                                                                                                                                                                                                                                                                           |
|-------------------------------|---------------------------------------------------------------------------------------------------------------------------------------------------------------------------------------------------------------------------------------------------------------------------------------------------------------------------------------------------------------------------------------------------------------------------------------------------------------------------------------------------------------------------------------------------------------------------------------------------------------------------------------------------------------------------------------------------------------------------------------------------------------------------------------------------------------------------------------------------------------------------------------------------------------------------------------------------------------------------------------------------------------------------------------------------------------------------------------------------------------------------------------------------------------------------------------------------------------------------------------------------------------------------------------------------------------------------------------------------------------------------------------------------------------------------------------------------------------------------------------------------------------------------------------------------------------------------------------------------------------------------------------------------------------------------------------------------------------------------------------------------------------------------------------------------------------------------------------------------------------------------------------------------------------------------------------------------------------------------------------------------------------------------------------------------------------------------|
| Journal:                      | <i>BMJ Open</i>                                                                                                                                                                                                                                                                                                                                                                                                                                                                                                                                                                                                                                                                                                                                                                                                                                                                                                                                                                                                                                                                                                                                                                                                                                                                                                                                                                                                                                                                                                                                                                                                                                                                                                                                                                                                                                                                                                                                                                                                                                                           |
| Manuscript ID                 | bmjopen-2022-063271.R1                                                                                                                                                                                                                                                                                                                                                                                                                                                                                                                                                                                                                                                                                                                                                                                                                                                                                                                                                                                                                                                                                                                                                                                                                                                                                                                                                                                                                                                                                                                                                                                                                                                                                                                                                                                                                                                                                                                                                                                                                                                    |
| Article Type:                 | Protocol                                                                                                                                                                                                                                                                                                                                                                                                                                                                                                                                                                                                                                                                                                                                                                                                                                                                                                                                                                                                                                                                                                                                                                                                                                                                                                                                                                                                                                                                                                                                                                                                                                                                                                                                                                                                                                                                                                                                                                                                                                                                  |
| Date Submitted by the Author: | 20-Sep-2022                                                                                                                                                                                                                                                                                                                                                                                                                                                                                                                                                                                                                                                                                                                                                                                                                                                                                                                                                                                                                                                                                                                                                                                                                                                                                                                                                                                                                                                                                                                                                                                                                                                                                                                                                                                                                                                                                                                                                                                                                                                               |
| Complete List of Authors:     | <p>Swann, Olivia; The University of Edinburgh Usher Institute of Population Health Sciences and Informatics, Centre for Medical Informatics; The University of Edinburgh Department of Child Life and Health,<br/>Lone, Nazir; The University of Edinburgh Usher Institute of Population Health Sciences and Informatics, Centre for Population Health Sciences<br/>Harrison, Ewen; The University of Edinburgh Usher Institute of Population Health Sciences and Informatics, Centre for Medical Informatics<br/>Tomlinson, Laurie; London School of Hygiene and Tropical Medicine Department of Non-communicable Disease Epidemiology<br/>Walker, Alex; University of Oxford Nuffield Department of Primary Care Health Sciences, The DataLab<br/>Seaborne, Michael; Swansea University, Centre for Population Health<br/>Pollock, Louisa; University of Glasgow Department of Child Health<br/>Farrell, James; The University of Edinburgh Usher Institute of Population Health Sciences and Informatics, Centre for Medical Informatics<br/>Hall, Peter; The University of Edinburgh MRC Institute of Genetics and Molecular Medicine, Institute of Cancer and Genetics<br/>Seth, Sohan; The University of Edinburgh School of Informatics<br/>Williams, Thomas; The University of Edinburgh Department of Child Life and Health,<br/>Preston, Jenny; University of Liverpool Faculty of Humanities and Social Sciences<br/>Ainsworth, Jennifer; University of Liverpool Faculty of Humanities and Social Sciences<br/>Semple, Freya; University of Glasgow School of Medicine Dentistry and Nursing<br/>Baillie, J; Roslin Institute, Division of Genetics and Genomics<br/>Katikireddi, Srinivasa; University of Glasgow, MRC/CSO Social &amp; Public Health Sciences Unit<br/>Akbari, Ashley; Swansea University Medical School; Swansea University Medical School, Health Data Research UK<br/>Lyons, Ronan; Swansea University Medical School<br/>Simpson, Colin; The University of Edinburgh, Usher Institute of Population Health Sciences and Informatics</p> |

|                                 |                                                                                                                                                                                                                                                                                                                                                                                                                                                                                                                                                                                                                                                                                                                  |
|---------------------------------|------------------------------------------------------------------------------------------------------------------------------------------------------------------------------------------------------------------------------------------------------------------------------------------------------------------------------------------------------------------------------------------------------------------------------------------------------------------------------------------------------------------------------------------------------------------------------------------------------------------------------------------------------------------------------------------------------------------|
|                                 | <p>Semple, Malcolm G; NIHR Health Protection Research Unit in Emerging and Zoonotic Infections at University of Liverpool; Alder Hey Children's Hospital, Respiratory Paediatrics</p> <p>Goldacre, Ben; University of Oxford Nuffield Department of Primary Care Health Sciences, The DataLab</p> <p>Brophy, Sinead; Swansea University Medical School, Health Data Research UK</p> <p>Sheikh, Aziz; The University of Edinburgh Usher Institute of Population Health Sciences and Informatics</p> <p>Docherty, Annemarie; The University of Edinburgh Usher Institute of Population Health Sciences and Informatics, Centre for Medical Informatics; University of Edinburgh, Anaesthesia and Critical Care</p> |
| <b>Primary Subject Heading</b>: | Infectious diseases                                                                                                                                                                                                                                                                                                                                                                                                                                                                                                                                                                                                                                                                                              |
| Secondary Subject Heading:      | Epidemiology, Paediatrics                                                                                                                                                                                                                                                                                                                                                                                                                                                                                                                                                                                                                                                                                        |
| Keywords:                       | COVID-19, Epidemiology < INFECTIOUS DISEASES, Paediatric infectious disease & immunisation < PAEDIATRICS, HEALTH ECONOMICS                                                                                                                                                                                                                                                                                                                                                                                                                                                                                                                                                                                       |
|                                 |                                                                                                                                                                                                                                                                                                                                                                                                                                                                                                                                                                                                                                                                                                                  |

SCHOLARONE™  
Manuscripts

1  
2  
3  
4  
5 Studying the Long-term Impact of COVID-19 in Kids (SLICK).  
6  
7 Healthcare use and costs in children and young people  
8  
9 following community-acquired SARS-CoV-2 infection: protocol  
10  
11 for an observational study using linked primary and secondary  
12  
13 routinely collected healthcare data from England, Scotland and  
14  
15  
16  
17  
18  
19  
20  
21  
22  
23  
24  
25  
26  
27  
28  
29  
30  
31  
32  
33  
34  
35  
36  
37  
38  
39  
40  
41  
42  
43  
44  
45  
46  
47  
48  
49  
50  
51  
52  
53  
54  
55  
56  
57  
58  
59  
60

# Studying the Long-term Impact of COVID-19 in Kids (SLICK). Healthcare use and costs in children and young people following community-acquired SARS-CoV-2 infection: protocol for an observational study using linked primary and secondary routinely collected healthcare data from England, Scotland and Wales.

## Author list and affiliations

Olivia V. Swann <sup>1,2\*</sup>, Nazir Lone <sup>3</sup>, Ewen M. Harrison <sup>1</sup>, Laurie A. Tomlinson <sup>4</sup>, Alex J. Walker <sup>5</sup>, Michael Seaborne <sup>6</sup>, Louisa Pollock <sup>7</sup>, James Farrell <sup>1</sup>, Peter S Hall <sup>8</sup>, Sohan Seth <sup>9</sup>, Thomas C. Williams <sup>2</sup>, Jennifer Preston <sup>10</sup>, J. Samantha Ainsworth <sup>10</sup>, Freya F. Semple <sup>11</sup>, J. Kenneth Baillie <sup>12</sup>, Srinivasa V Katikireddi <sup>13</sup>, Ashley Akbari <sup>14</sup>, Ronan A Lyons <sup>14</sup>, Colin R Simpson <sup>3,15</sup>, Malcolm G. Semple <sup>16</sup>, Ben Goldacre <sup>5</sup>, Sinead Brophy <sup>17</sup>, Aziz Sheikh <sup>3</sup> and Annemarie B. Docherty <sup>1</sup>

\* *Corresponding author*. Dr Olivia Swann, PhD, Clinical Lecturer in Paediatric Infectious Diseases, Centre for Medical Informatics, Usher Institute, University of Edinburgh, Edinburgh, UK.

Email: [Olivia.Swann@ed.ac.uk](mailto:Olivia.Swann@ed.ac.uk)

## Affiliations

1. Centre for Medical Informatics, Usher Institute, University of Edinburgh, Edinburgh, UK
2. Department of Child Life and Health, University of Edinburgh, Edinburgh, UK
3. Usher Institute, University of Edinburgh, Edinburgh, UK
4. Department of Non-Communicable Disease Epidemiology, London School of Hygiene and Tropical Medicine, London, United Kingdom.



- 1
- 2
- 3
- 4 5. The DataLab, Nuffield Department of Primary Care Health Sciences, University of
- 5 Oxford, Oxford, UK
- 6
- 7 6. Centre for Population Health, Swansea University, Swansea, UK
- 8
- 9 7. Child Health, School of Medicine, Dentistry and Nursing, University of Glasgow,
- 10 Glasgow, UK
- 11
- 12 8. Institute of Cancer and Genetics, University of Edinburgh, Edinburgh, UK
- 13
- 14 9. School of Informatics, University of Edinburgh, Edinburgh, UK
- 15
- 16 10. Faculty of Humanities & Social Sciences, University of Liverpool
- 17
- 18 11. School of Medicine, Dentistry and Nursing, University of Glasgow, Glasgow, UK
- 19
- 20 12. Roslin Institute, University of Edinburgh, Edinburgh, UK
- 21
- 22 13. MRC/CSO Social & Public Health Sciences Unit, University of Glasgow, Glasgow,
- 23 UK
- 24
- 25 14. Swansea University Medical School, Swansea University, Swansea, UK
- 26
- 27 15. School of Health, Faculty of Health, Victoria University of Wellington, Wellington,
- 28 New Zealand
- 29
- 30 16. NIHR Health Protection Research Unit in Emerging and Zoonotic Infections and
- 31 Institute of Infection, Veterinary and Ecological Sciences, Faculty of Health and Life
- 32 Sciences, University of Liverpool, Liverpool, UK
- 33
- 34 17. Health Data Research UK, Swansea University Medical School, Swansea University,
- 35 Swansea, UK.
- 36
- 37
- 38
- 39
- 40
- 41
- 42
- 43
- 44
- 45
- 46
- 47
- 48
- 49
- 50
- 51
- 52
- 53
- 54
- 55
- 56
- 57
- 58
- 59
- 60

## Abstract

### *Introduction*

Severe acute respiratory syndrome coronavirus 2 (SARS-CoV-2) infection rarely causes hospitalisation in children and young people (CYP), but mild or asymptomatic infections are common. Persistent symptoms following infection have been reported in CYP but subsequent healthcare use is unclear. We aim to describe healthcare use in CYP following community-acquired SARS-CoV-2 infection and identify those at risk of ongoing healthcare needs.

### *Methods and analysis*

We will use anonymised individual-level, population-scale national data linking demographics, comorbidities, primary and secondary care use and mortality between 01/01/2019-01/05/2022. SARS-CoV-2 test data will be linked from 01/01/20-01/05/2022. Analyses will use Trusted Research Environments: OpenSAFELY in England, Secure Anonymised Information Linkage (SAIL Databank) in Wales and Early Pandemic Evaluation and Enhanced Surveillance of COVID-19 (EAVE-II) in Scotland. CYP aged  $\geq 4$  and  $< 18$  years who underwent SARS-CoV-2 reverse transcription polymerase chain reaction (RT-PCR) testing between 01/01/20 and 01/05/21 and those untested CYP will be examined.

The primary outcome measure is cumulative healthcare cost over 12 months following SARS-CoV-2 testing, stratified into primary or secondary care, and physical or mental healthcare. We will estimate the burden of healthcare use attributable to SARS-CoV-2 infections in the 12 months after testing using a matched cohort study of RT-PCR positive, negative or untested CYP matched on testing date, with adjustment for confounders. We will identify factors associated with higher healthcare needs in the 12 months following SARS-CoV-2 infection using an unmatched cohort of RT-PCR positive CYP. Multivariable logistic regression and machine learning approaches will identify risk factors for high healthcare use and characterise patterns of healthcare use post infection.

### *Ethics and dissemination*

This study was approved by the South-Central Oxford C Health Research Authority Ethics Committee (13/SC/0149). Findings will be pre-printed and published in peer-reviewed

1  
2  
3 journals. Analysis code and code-lists will be available through public GitHub repositories  
4 and OpenCodelists with meta-data via HDR-UK Innovation Gateway.  
5  
6  
7  
8  
9  
10  
11  
12  
13  
14  
15  
16  
17  
18  
19  
20  
21  
22  
23  
24  
25  
26  
27  
28  
29  
30  
31  
32  
33  
34  
35  
36  
37  
38  
39  
40  
41  
42  
43  
44  
45  
46  
47  
48  
49  
50  
51  
52  
53  
54  
55  
56  
57  
58  
59  
60

For peer review only

## Article Summary

### Strengths:

1. Objective, direct examination of clinician-recorded healthcare use by CYP post SARS-CoV-2 infection.
2. Population-wide coverage of all children and young people (CYP) <18 years in Scotland and Wales and approximately 4.8 million CYP in England.

### Limitations:

1. Lack of access to SARS-CoV-2 lateral flow testing (rapid antigen testing) results may result in misattribution of SARS-CoV-2 status in patients when reverse transcription polymerase chain reaction (RT-PCR) testing was not performed.
2. Access to health services is presumed to be available for anyone who needed it, but this may have been reduced by local healthcare policies and patient health-seeking behaviour at different points during the pandemic.
3. Owing to the time needed for 12 months of follow up, this study will focus on healthcare use after infection with wildtype and Alpha variants of SARS-CoV-2, which may differ from Delta and Omicron.

## Introduction

Severe acute respiratory syndrome coronavirus 2 (SARS-CoV-2) causes the disease COVID-19, with adults being more severely affected than children throughout the pandemic<sup>1</sup>. While hospitalisation with SARS-CoV-2 is rare in children and young people (CYP)<sup>2</sup>, infection is common, with up to 70% (95% CI 68-71) of 5-14 year olds estimated to have been infected with SARS-CoV-2 in the UK by December 2021<sup>3</sup>. Whilst research on COVID-19 in CYP has focused on index hospitalisations and deaths, this acute view means we have not established what the additional healthcare needs are for the majority of CYP after mild or asymptomatic SARS-CoV-2 infection. There is also little information on the changes to healthcare use in children with co-morbidities who may be at risk of exacerbations (for example asthma). The large numbers of CYP infected with SARS-CoV-2 in the UK means that even a small increase in healthcare use in this population could substantially impact on

1  
2  
3  
4 healthcare services. Being asymptomatic with initial infection does not guarantee against  
5  
6 developing subsequent illness from SARS-CoV-2, for example CYP who are asymptomatic  
7  
8 with their initial SARS-CoV-2 infection can develop Multisystem Inflammatory Syndrome in  
9  
10 Children (MIS-C) two to eight weeks later <sup>4</sup>. Whilst this complication is extremely rare  
11  
12 (approximately 3 cases per 10,000 infections <sup>5</sup>), it underlines the need to include CYP who  
13  
14 are initially asymptomatic from SARS-CoV-2 infection when examining subsequent  
15  
16 healthcare use.

17  
18 A wide variety of persistent symptoms have been reported in CYP following SARS-CoV-2  
19  
20 infection with studies varying in design and quality (reviewed in <sup>6</sup>). Most reports have used a  
21  
22 questionnaire or clinic-based approach to symptom reporting, often after hospitalisation with  
23  
24 COVID-19 or in patients self-identifying as having Long-COVID, introducing significant  
25  
26 potential sources of bias.

27  
28 Data on long term healthcare use following SARS-CoV-2 infection is beginning to emerge,  
29  
30 although most studies have focused on adults rather than CYP. One large study of  
31  
32 American adults ( $n=5,064,270$ ) reported an increase in outpatient healthcare use in the six  
33  
34 months following SARS-CoV-2 infection (hazard ratio of 1.20 (1.19–1.21))<sup>7</sup>. Another  
35  
36 American study ( $n=250,514$ ) found COVID-19 diagnosis was associated with an additional  
37  
38 0.7269 (95% CI, 0.7088 to 0.7449) monthly healthcare visits (combined inpatient and  
39  
40 outpatient visits excluding respiratory healthcare contacts) in the six months after diagnosis  
41  
42 <sup>8</sup>. This study did include some CYP ( $n$  not given) and reported that healthcare use post-  
43  
44 COVID-19 diagnosis increased slightly from two to five months after diagnosis for those  
45  
46  $\leq 17$  years old, but returned to pre-diagnosis baseline levels by six months.

47  
48 One Norwegian study examined healthcare use in CYP aged 1-19 years ( $n=706,885$ ) for six  
49  
50 months from SARS-CoV-2 testing and reported an increase in primary healthcare use for all  
51  
52 ages during the first one to four weeks following a positive test compared with CYP who  
53  
54 tested negative <sup>9</sup>. These presentations were predominantly respiratory. This increase in  
55  
56 healthcare use was more sustained in younger CYP, while those aged 16-19 years returned  
57  
58 to baseline healthcare use by five to eight weeks. The study did not find any increase in use  
59  
60 of specialist care for any age group.

1  
2  
3 No studies have yet examined healthcare use in CYP in the United Kingdom (UK) following  
4 SARS-CoV-2. Using routinely collected anonymised electronic health record (EHR) data at  
5 an individual-level, population-scale matched by SARS-CoV-2 RT-PCR status to examine  
6 healthcare use after SARS-CoV-2 infection in CYP offers an alternative method to  
7 questionnaire or clinic-based symptom reporting after SARS-CoV-2. In addition to traditional  
8 epidemiological approaches, machine learning methods are also proving increasingly  
9 important in the analysis of large routinely collected healthcare datasets in SARS-CoV-2<sup>10</sup>.  
10 Using machine learning to identify clusters of patients with similar healthcare trajectories  
11 provides a complementary approach to traditional epidemiology to identify patients at risk of  
12 high healthcare use post infection. A combination of approaches would establish the long-  
13 term healthcare use attributable to SARS-CoV-2 in CYP, which is essential both for tailoring  
14 individual care for patients at risk of high healthcare use post infection and informing health  
15 service and vaccination planning.  
16  
17  
18  
19  
20  
21  
22  
23  
24  
25  
26  
27  
28  
29  
30

## 31 Aims

32 We aim to establish the patterns and burden of healthcare use in CYP attributable to  
33 community-acquired SARS-CoV-2 infection and identify those CYP at risk of high or ongoing  
34 healthcare needs in England, Scotland and Wales.  
35  
36  
37  
38  
39  
40

## 41 Objectives

42 We will:

- 43 1. Describe the background healthcare use in CYP before and during the pandemic.
- 44 2. Compare healthcare use in CYP in the 12 months after testing positive, negative or  
45 not being tested for SARS-CoV-2 by RT-PCR to estimate burden of healthcare use  
46 attributable to SARS-CoV-2.
- 47 3. Identify factors associated with higher healthcare use (including having co-  
48 morbidities) in the 12 months following SARS-CoV-2 infection.  
49  
50  
51  
52  
53  
54  
55  
56  
57  
58  
59  
60

## Methods

### Study period

The period covered by the study will span 01/01/2019 to 01/05/22 and focus on SARS-CoV-2 infections until 01/05/21. This study period was chosen to provide 12 months of follow up data for CYP infected to the end of the second wave of SARS-CoV-2 in the UK (end of April 2021 <sup>11</sup>) as well as those testing negative or not tested. Inclusion of the period from 01/01/19 to 01/01/20 will also provide at least a year of data on pre-pandemic data on healthcare use for each CYP.

### Study design

The study will comprise three main approaches; a descriptive graphical analysis addressing Objective 1 (background healthcare use before and during the pandemic), a matched cohort study addressing Objective 2 (estimating healthcare use post SARS-CoV-2 infection) and an unmatched cohort study addressing Objective 3 (identifying factors associated with higher healthcare needs post SARS-CoV-2 infection).

### Study Population

The study population will vary with objective:

#### Inclusion criteria (all objectives):

- Registered with a General Practitioner (GP) in Scotland (includes all general practices), Wales or England (The Phoenix Partnership (TPP) a group of GP practices with a unified electronic patient-record system covering approximately 34% of practices in England <sup>12</sup>)

#### Exclusion criteria (all objectives):

- Positive index SARS-CoV-2 RT-PCR test performed after 7 days in hospital (to exclude nosocomial infections <sup>13</sup>)
- CYP with discrepant SARS-CoV-2 RT-PCR results on the same date

#### Objective 1- Objective-specific inclusion criteria

- Age  $\geq 4$  years and  $< 18$  years on 01/01/19 (pre-pandemic period)
- Age  $\geq 4$  years and  $< 18$  years on 01/01/20 (pandemic period – pandemic year 1)
- Age  $\geq 4$  years and  $< 18$  years on 01/01/21 (pandemic period – pandemic year 2)

### Objective 2 - Objective-specific inclusion criteria

- Underwent SARS-CoV-2 PCR testing (or untested but matched to CYP who had been tested) between 01/01/20 and 01/05/21
- Age  $\geq 4$  and  $< 18$  years on date of testing / matching
- At least 12 months of healthcare data available both before and after SARS-CoV-2 PCR test / date of matching if not tested
- No previous positive SARS-CoV-2 PCR test recorded

### Objective 3 - Objective-specific inclusion criteria

- Positive SARS-CoV-2 RT-PCR test between 01/01/20 and 01/05/21
- Age  $\geq 4$  and  $< 18$  years on date of testing
- At least 12 months of healthcare data available both before and after SARS-CoV-2 PCR test
- No previous positive SARS-CoV-2 PCR test recorded

### Data sources and validation

Data will be held securely and analyses conducted within nation-specific Trusted Research Environments (TREs): OpenSAFELY in England <sup>14</sup>, Secure Anonymised Information Linkage (SAIL Databank <sup>15</sup>) in Wales and the Early Pandemic Evaluation and Enhanced Surveillance of COVID-19 (EAVE-II) platform <sup>16</sup> within Public Health Scotland in Scotland. TREs provide secure computing environments which hold data remotely and enable access for analysis without the data itself ever leaving the secure site.

OpenSAFELY is a secure, transparent, open-source software platform for analysis of electronic health records data allowing detailed analysis of pseudonymised primary care patient records in England. Other datasets are linked within the same environment using a matching pseudonym derived from the National Health Service (NHS) number.

SAIL Databank brings together electronically-held, person-based, routinely-collected demographic and clinical data across Wales for the purpose of conducting and supporting health-related research, which are pseudonymised using Anonymous Linking Fields.



1  
2  
3  
4 EAVE-II is a national linked dataset of patient-level primary care data, out-of-hours,  
5 hospitalisation, mortality and laboratory data across Scotland. Data is held securely and  
6 analysed in the Public Health Scotland TRE.  
7  
8

9  
10 Deterministic and probabilistic linking of datasets will be carried out via Community Health  
11 Index (CHI) number in Scotland and by NHS number in England and Wales. NHS and CHI  
12 numbers are unique identifiers used in all health-care contacts across the NHS <sup>17</sup>. Datasets  
13 contributing to each country's final database are described in *Supplementary Table 1* with  
14 data flow diagrams in *Supplementary Figures A-C*. In addition to the study period outlined,  
15 data from birth will also be examined to identify comorbidities, including common chronic  
16 childhood conditions <sup>18</sup>. In the event of missing data, these will be supplemented by  
17 information for that CYP in linked datasets. All variables will be checked for patterns of  
18 missingness and implausible values and a log maintained for reasons where records are  
19 excluded from analysis. In cases where an analysis variable has high levels of missingness,  
20 alternative variables which are closely related may be considered as a proxy for these  
21 missing data. Depending on the cause ascertained for missing variables, we will consider  
22 imputation.  
23  
24  
25  
26  
27  
28  
29  
30  
31  
32

33  
34 As PIMS-TS is a new disease, ICD-10 coding was not introduced until November 2020.  
35 Admission will be considered due to PIMS-TS if occurring between 01/02/20 – 01/11/20 and  
36 coded as Kawasaki disease, toxic shock syndrome or systemic inflammatory response  
37 (proxies for PIMS-TS) or if admitted after 01/11/20 and coded as PIMS-TS <sup>19</sup>. National  
38 PIMS-TS databases (available in Scotland and Wales) will be used for sensitivity analyses.  
39  
40  
41  
42  
43  
44 The major data sources for each variable are detailed in *Table 1* (adapted from <sup>20</sup>).  
45  
46  
47  
48  
49  
50  
51  
52  
53  
54  
55  
56  
57  
58  
59  
60

Table 1. Groupings of variables by source

|                                   | Variable                                    | Data source                          |                                        |                                       |
|-----------------------------------|---------------------------------------------|--------------------------------------|----------------------------------------|---------------------------------------|
|                                   |                                             | England<br>(OpenSAFELY)              | Scotland<br>(EAVE-II)                  | Wales<br>(SAIL)                       |
| <b>Demographics</b>               | Sex                                         | TPP                                  | EAVE-II                                | WDSW/WLGP                             |
|                                   | Age                                         | TPP                                  | EAVE-II                                | WDSW/WLGP                             |
|                                   | Ethnicity                                   | TPP                                  | EAVE-II                                | CENW/NCH                              |
| <b>Socio-economic</b>             | IMD                                         | TPP                                  | EAVE-II                                | WDSW                                  |
| <b>Place of residence</b>         | Health board / STP,<br>urban rural index    | TPP                                  | EAVE-II                                | WDSW                                  |
| <b>Accommodation type</b>         | Private or social housing                   | <i>NA</i>                            | EAVE-II                                | CENW                                  |
| <b>Comorbidities</b>              | Chronic childhood<br>conditions             | TPP, SUS<br>APCS, SUS<br>OPA, ISARIC | EAVE-II,<br>SMR00/01/04<br>/06, ISARIC | CYFI, BREC,<br>WCSU,<br>WLGP,<br>PEDW |
|                                   | SARS-CoV-2 shielding<br>list                | TPP                                  | EAVE-II                                | CVSP                                  |
| <b>SARS-CoV-2<br/>vaccination</b> | Vaccine (type, date)                        | TPP                                  | TVMT                                   | CVVD                                  |
| <b>Laboratory tests</b>           | RT-PCR SARS-CoV-2<br>test (date and result) | SGSS                                 | COVID-<br>testing                      | PATD                                  |
|                                   | Viral variant                               | SGSS                                 | COG UK                                 | CVSD/PATD                             |
| <b>Secondary care</b>             | ED contact                                  | SUS ECDS                             | A+E<br>Datamart                        | EDDD/EDDS                             |
|                                   | Outpatient clinic contact                   | SUS OPS                              | SMR00                                  | OPDW                                  |
|                                   | Hospital admission                          | SUS APCS                             | SMR01/04                               | PEDW                                  |
|                                   | Admission ICD-10 code                       | SUS APCS                             | SMR                                    | PEDW                                  |
|                                   | Level of care                               | SUS /<br>ISARIC                      | SMR /<br>ISARIC                        | PEDW/CCDS                             |
|                                   | Length of stay                              | SUS /<br>ISARIC                      | SMR /<br>ISARIC                        | PEDW/CCDS                             |
|                                   | PIMS-TS                                     | SUS /<br>ISARIC                      | SMR /<br>ISARIC                        | PEDW/CCDS                             |
| <b>Primary care</b>               | In-hours contact                            | TPP                                  | EAVE-II                                | WLGP                                  |

|                         | Community prescriptions                                                          | TPP                                 | EAVE-II / PIS           | WDDS                          |
|-------------------------|----------------------------------------------------------------------------------|-------------------------------------|-------------------------|-------------------------------|
| <b>Unscheduled care</b> | NHS 111 contact<br>Ambulance contact<br>GP out of hours contact                  | <i>NA</i><br><i>NA</i><br><i>NA</i> | NHS 24<br>SAS<br>GP OOH | NHSO<br>WASD/NHS<br>O<br>NHSO |
| <b>Mortality</b>        | Death (all cause, COVID-19 main cause or <28 days of positive SARS-CoV-2 RT-PCR) | ONS deaths                          | NRS deaths              | ONS deaths / ADDE             |
| <b>Symptoms</b>         | Presenting symptoms in CYP admitted with SARS-CoV-2                              | ISARIC (subset only)                | ISARIC (subset only)    | ISARIC (subset only)          |

**Abbreviations:** **EAVE-II**=Early Pandemic Evaluation and Enhanced Surveillance of COVID-19; **SAIL**: Secure Anonymised Information Linkage; **IMD**=Index of Multiple Deprivation; **STP**=Sustainability and Transformation Partnership (STP, geographical areas configured for regional reorganisation in England), **ED**= Emergency Department; **ICD-10**=International Classification of Diseases 10th Revision; **NHS**=National Health Service; **GP**=general practice; **PIMS-TS**= Paediatric multisystem inflammatory syndrome temporally associated with COVID-19; **TPP**=The Phoenix Partnership (GP group); **SUS**=Secondary Use Services; **APCS**=Admitted patient care statistics; **OPA**=Outpatient attendances; **ECDS**=Emergency care datasets; **SGSS**=Second Generation Surveillance System; **ISARIC** =International Severe Acute Respiratory and emerging Infection Consortium / COVID-19 Clinical Information Network; **ONS**: Office for National Statistics; **SMR**=Scottish Morbidity Record; **TMVT**=Turas Vaccination Management Tool; **COG-UK**=Centre of Genomics United Kingdom; **PIS**= Prescribing Information System; **SAS**=Scottish Ambulance Service; **OOH**=Out Of Hours; **NRS**=National Records of Scotland; **WLGP**=Welsh Longitudinal General Practice; **PEDW**=Patient Episode Database for Wales; **ADDE**=Annual District Death Extract; **CCDS**=Critical Care Data Source; **CDDS**=COVID-19 Consolidated Deaths; **CENW**=Office of National Statistics Census; **CTTP**=COVID-19 Test Trace & Protect; **CVLF**=COVID-19 Lateral Flow; **CVSP**=COVID-19 Shielded People; **CVVD**=COVID-19 Vaccine Data; **EDDD**=Emergency Department Dataset Daily; **EDDS**=Emergency Department Dataset; **ICCD**=Intensive Care National Audit & Research Centre (ICNARC)-COVID only admissions; **ICNC**=Intensive Care National Audit & Research Centre (ICNARC); **MIDS**=Maternity Indicators Dataset; **NCCH**=National Community Child Health; **NHSO**=NHS 111 Call data; **OPDW**=Outpatient Dataset for Wales; **OPRD**=Outpatient Referral Dataset; **PATD**=Pathology Data (COVID-19 daily); **RTTD**=Referral to Treatment Times Dataset; **WASD**=Welsh Ambulance Service Dataset; **WCSU**=Welsh Cancer Incidence Surveillance Unit; **WDDS**=Welsh Dispensing Dataset; **WDSD**=Welsh Demographic Service Dataset. **NA**=Not available.

## Exposure

The exposure of interest is diagnosis of SARS-CoV-2 infection, defined as a positive RT-PCR test result. The date of exposure is defined as the date of the positive RT-PCR test result.

## Outcomes

The primary outcome measure will be cumulative NHS healthcare costs over the 12 months following SARS-CoV-2 testing. This will provide an overarching measure that is reflective of healthcare resource use, which is expressed on a monetary scale that is common between the three nations and common to all types of activity. Activity will only contribute to the primary outcome measure if it is quantifiable from data in all three nations. Healthcare costs will be broken down into budget-holder perspectives; secondary care (critical care/inpatient/outpatient/A&E) and primary care (face-to face or telephone in-hours primary care activity). A sensitivity analysis of unscheduled care (e.g. NHS 24, ambulance, GP OOH) will be undertaken for the nations where this data is available (Scotland and Wales). To ensure comparability, unit costs will be assigned from a common country (England) using Personal Social Services Research Unit costs with a common base year <sup>21</sup>.

Secondary outcomes will constitute units of healthcare activity, quantifiable as counts over time or rates, that can be quantified to a common definition between the three nations, e.g. inpatient episodes by specialty or primary care appointments. Both primary and secondary outcomes will be stratified into predominantly physical or mental healthcare based on the primary reason for admission / attendance. The reason for healthcare use will also be further explored (e.g. by body system / healthcare speciality).

## Statistical analyses

Analyses will be replicated across the three nations in each respective TRE.

### *Objective 1*

*Describe the background healthcare use in CYP before and during the pandemic.*

Significant, dynamic changes in both healthcare access and healthcare-seeking behaviour have occurred across the course of the pandemic to date. As such, exploration of background healthcare use in CYP before and during the pandemic will help contextualise subsequent analyses. A descriptive, graphical analysis will be undertaken. Healthcare use (represented as cost) will be plotted for the period of 01/01/19 to 01/05/22 for all CYP. These data will be stratified by variables including age, sex, nation of residence, type of healthcare

1  
2  
3 (primary or secondary care) and RT-PCR status (RT-PCR positive, RT-PCR negative and  
4 never tested). Reasons for healthcare visits will also be explored.  
5  
6

### 7 *Objective 2*

8  
9 *Compare healthcare use in CYP in the 12 months after testing positive, negative or not*  
10 *being tested for SARS-CoV-2 by RT-PCR to estimate the burden of healthcare use*  
11 *attributable to SARS-CoV-2.*  
12  
13  
14

15  
16 This analysis will focus on estimating the burden of CYP healthcare use which is attributable  
17 to SARS-CoV-2 infection in the 12 months after infection, whereas individual factors  
18 associated with healthcare use after infection will be explored in Objective 3. As well as total  
19 healthcare use in the 12 months following SARS-CoV-2 infection, we will also break this  
20 objective into 0-3, 3-6, 6-9 and 9-12 month brackets to examine how healthcare use  
21 changes across time.  
22  
23  
24  
25  
26

27 A prospective matched cohort study will be undertaken. Matching will be undertaken for date  
28 of RT-PCR test with iterative widening bands as necessary. This will account for availability  
29 of testing, access to healthcare, variation in incidence rates, emergence of viral variants,  
30 changes in SARS-CoV-2 treatment and systematically different characteristics in the tested  
31 population (compared to the untested population) as the pandemic progressed  
32 (*Supplementary Figure D*). Ten RT-PCR test negative non-hospitalised control CYP will be  
33 matched without replacement for every RT-PCR positive case.  
34  
35  
36  
37  
38  
39

40  
41 Stabilised inverse probability weights will be used to adjust for known confounder imbalance  
42 between cases and controls. The following variables will be explored: age, sex, SARS-CoV-  
43 2 vaccination status at the time of index RT-PCR test (considered vaccinated if  $\geq 3$  weeks  
44 since first dose), geographical region (health board / Sustainability and Transformation  
45 Partnership (STP)) to account for regional differences in RT-PCR testing and availability of  
46 healthcare, previous healthcare contact (primary or secondary), chronic conditions, number  
47 of previous SARS-CoV-2 tests, socioeconomic status (quintiles of relevant national  
48 deprivation measure: Scottish Index of Multiple Deprivation (SIMD), Welsh Index of Multiple  
49 Deprivation (WIMD) and Lower layer Super Output Area (LSOA)) and urban-rural index.  
50  
51  
52  
53  
54  
55  
56  
57  
58  
59  
60

1  
2  
3  
4 Factors are associated with being brought for RT-PCR testing (e.g. public awareness and  
5 testing availability) may be different from those of exposure to SARS-CoV-2. A directed  
6 acyclic graph of factors associated with SARS-CoV-2 RT-PCR testing and healthcare use to  
7 consider in model building is shown in *Supplementary Figure D*.  
8  
9

10  
11 In contrast to adults, the median hospital length of stay due to SARS-CoV-2 in CYP is short,  
12 previously reported in the UK as 2 days (IQR 1-4)<sup>22</sup>. As such, follow up will start 14 days  
13 after testing positive for SARS-CoV-2 on RT-PCR which will enable us to look back and  
14 further stratify the exposure by SARS-CoV-2 severity (i.e. community care, hospitalisation or  
15 critical care).  
16  
17

18  
19 CYP in the control group may subsequently test positive for SARS-CoV-2 by RT-PCR. If this  
20 occurs during the RT-PCR testing period of interest (01/01/20 - 01/05/21) they will become a  
21 case and follow-up commenced for 12 months (with appropriate matches for the date of the  
22 positive RT-PCR). If the control tests positive after 01/05/21 (i.e. after the RT-PCR testing  
23 period of interest), they will be censored and will not become a case. A graphical illustration  
24 of the potential CYP paths for this analysis is shown in *Figure 1*.  
25  
26  
27  
28  
29  
30  
31  
32  
33  
34  
35  
36  
37  
38  
39  
40  
41  
42  
43  
44  
45  
46  
47  
48  
49  
50  
51  
52  
53  
54  
55  
56  
57  
58  
59  
60

1  
2  
3  
4 As CYP who are brought for RT-PCR testing are systematically different to those who are  
5 not brought <sup>23</sup>, a sensitivity analysis will be undertaken to compare the RT-PCR positive  
6 cohort against the population of CYP who have never tested positive (i.e. both RT-PCR  
7 negative and untested CYP), hereafter “population controls.” RT-PCR positive CYP will be  
8 matched to ten population controls who were not hospitalised on the date of their matched  
9 case’s RT-PCR <sup>7</sup>. Confounding will then be minimised as described above. A graphical  
10 illustration of the potential CYP paths for this analysis is shown in *Supplementary Figure E*.

11  
12  
13  
14  
15  
16  
17 The proportion of CYP with SARS-CoV-2 infection but without a positive RT-PCR (e.g.  
18 tested by lateral flow (rapid antigen test) or untested asymptomatic cases) has increased  
19 across the pandemic <sup>3</sup>. As such, we will conduct quantitative bias analyses for unmeasured  
20 confounding using different estimates of undetected SARS-CoV-2 infection across the study  
21 period.  
22  
23  
24  
25  
26  
27  
28

### 29 *Objective 3*

30  
31 *Identify factors associated with higher healthcare use (including having co-morbidities) in the*  
32 *12 months following SARS-CoV-2 infection.*  
33  
34  
35

36 Both regression and machine learning approaches will be undertaken to examine healthcare  
37 costs in the SARS-CoV-2 RT-PCR positive cohort. A multivariable regression model will be  
38 constructed with covariates including demographics (age, sex, socioeconomic status, urban-  
39 rural Index and health board / STP, pre-existing health status (chronic comorbidities,  
40 previous health care resource use, number of dispensed prescriptions, vaccination status  
41 and number of previous PCR tests), markers of severity of illness (community, hospital or  
42 intensive care within 14 days of index RT-PCR positive result) and PIMS-TS. In order to  
43 examine CYP admitted due to SARS-CoV-2 (rather than those with incidental SARS-CoV-2  
44 infection and another reason for admission), a sensitivity analysis will be performed  
45 excluding CYP with index SARS-CoV-2 RT-PCR undertaken 72 hours or less before an  
46 elective admissions, day case procedure or undertaken at any time during hospitalisation for  
47 trauma or emergency surgery.  
48  
49  
50  
51  
52  
53  
54  
55  
56  
57  
58  
59  
60



1  
2  
3  
4 We will then explore machine learning approaches to identify patterns of healthcare use over  
5 time following SARS-CoV-2 infection. Incorporating a machine learning analysis into this  
6 study will enable us to examine healthcare use across the 12 month period in a detailed  
7 way, investigating whether there are distinct groups of CYP who use healthcare in different  
8 ways over this period (i.e. different trajectories). This might be in the level of healthcare used  
9 (e.g. GP appointments, outpatient clinics or hospital admissions) or in when they use them  
10 (e.g. one group may have higher “upfront” healthcare use in the early period after SARS-  
11 CoV-2 infection while another has prolonged high healthcare throughout the 12 month  
12 period). Machine learning will allow us to cluster CYP into such trajectory groups and then  
13 explore whether particular characteristics are associated with each trajectory. “

14  
15  
16 We will categorise CYP into groups based on their trajectories (i.e. patterns of healthcare  
17 use). Both total healthcare cost and types of healthcare (secondary care and scheduled  
18 primary care) will be considered. This will be done using three approaches: a) latent growth  
19 mixture model of aggregated healthcare uses over a month <sup>24</sup>, b) Bayesian categorical time  
20 series clustering of daily service uses of different types <sup>25</sup>, and c) centroid based clustering  
21 with dynamic time warping distance of smoothed healthcare use cost <sup>26</sup>. By modelling this  
22 time series of healthcare use, we will group patients into clusters with similar patterns, e.g.,  
23 one cluster may correspond to CYP who use general practices on a frequent basis but are  
24 not admitted to hospital while another cluster may belong to CYP who do not use general  
25 practices but attend outpatient clinics regularly.

26  
27  
28 After identifying CYP clusters, characteristics (including demographics, comorbidities and  
29 previous healthcare use) will be examined to identify any factors which may associated with  
30 higher healthcare needs post SARS-CoV-2. These analyses will be stratified by  
31 hospitalisation (i.e. hospital admission within 14 days of index RT-PCR positive result) or  
32 community care and by diagnosis of PIMS-TS. A sensitivity analysis excluding CYP with  
33 presumed incidental SARS-CoV-2 will be carried out as detailed above.

### 34 Sensitivity analysis

35 It is likely that the majority of healthcare costs will be experienced within the first three  
36 months of SARS-CoV-2 infection <sup>9</sup>. Following on from Objectives 2 and 3, we will extend the  
37 end date of the cohort to three months before the date of data extraction, and examine  
38  
39  
40  
41  
42  
43  
44  
45  
46  
47  
48  
49  
50  
51  
52  
53  
54  
55  
56  
57  
58  
59  
60



1  
2  
3 healthcare use in the three months following infection with SARS-CoV-2. This will enable us  
4 to examine healthcare with later Delta (B.1.617.2) and Omicron (B.1.1.529) variants.  
5  
6

### 7 Anticipated limitations

8  
9 Whilst this protocol has been carefully developed there are anticipated limitations due to  
10 constraints of the data. Given the study period, it will also only be possible to examine the  
11 annual healthcare costs following infections with wildtype or Alpha (B.1.1.7) SARS-CoV-2  
12 variant infections which may not be the same as after Delta (B.1.617.2) or Omicron  
13 (B.1.1.529) variant infections. Data on SARS-CoV-2 viral variant is not consistently available  
14 for all CYP in this study. As such, time of RT-PCR testing will be used as a proxy for  
15 circulating viral variant at that time. The datasets included do not contain information on  
16 SARS-CoV-2 lateral flow testing results which could result in misattribution of SARS-CoV-2  
17 status in patients if RT-PCR testing was not performed. This is likely to particularly affect the  
18 later months of the study period where the highly transmissible Omicron variant was  
19 widespread and government advice no longer advocated RT-PCR following a positive lateral  
20 flow test in some situations <sup>27</sup>. In addition, the study will presume that healthcare services  
21 were available for anyone who needed them, but this may have been affected by local  
22 healthcare policies and patient health-seeking behaviour at different points during the  
23 pandemic. Whilst this study will investigate healthcare use in the 12 months after SARS-  
24 CoV-2 infection, there will be other reasons for healthcare contacts in CYP which are not  
25 attributable to initial infection which cannot be accounted for in this analysis. This study only  
26 examines SARS-CoV-2 infections, not other viral or bacterial infections. It is possible that  
27 susceptibility to other infections is not the same in the SARS-CoV-2 RT-PCR positive and  
28 negative groups, potentially resulting in more healthcare contacts if one group has more  
29 non-SARS-CoV-2 infections over the study period than the other.  
30  
31  
32  
33  
34  
35  
36  
37  
38  
39  
40  
41  
42  
43  
44  
45  
46  
47

48 Finally, every observational study design has its own limitations. The design of this study  
49 relies on CYP registered with a GP which may introduce selection bias against those who  
50 are not registered (e.g. in temporary accommodation) as well as the potential for recording  
51 biases in individuals coding the healthcare data.  
52  
53  
54  
55  
56  
57  
58  
59  
60

## Patient and Public Involvement and Engagement (PPIE)

This proposal was developed together with the Liverpool Generation-R Young Person's Advisory Group (YPAG), a group of engaged CYP aged between 12 and 21 years with lived experience of the SARS-CoV-2 pandemic. A member of the YPAG is also a co-investigator and member of the steering committee, helping ensure the study is delivered appropriately and that decisions about study implementation are guided by meaningful PPIE input. We will undertake two interactive workshops with the YPAG to co-create educational materials for use in schools/science fairs. We will also use these workshops to discuss challenges regarding misinformation about SARS-CoV-2, strategies to correctly share information to young people using social media and the use of routine data in research. The YPAG have named the study – “Studying the Long-term Impact of COVID-19 in Kids (SLICK)” and chosen the logo (*Supplementary Figure F*).

## Ethics and Dissemination

This study was approved by the South Central - Oxford C - Health Research Authority Research Ethics Committee, approval reference number 13/SC/0149. This study involves routinely collected anonymised data and as such participant consent was not required.

The EAVE-II dataset was approved by the National Research Ethics Service Committee, South East Scotland 02 (REC number: 12/SS/0201) and the Public Benefit and Privacy Panel for Health and Social Care (reference number: 1920-0279).

EAVE-II was established to provide real time surveillance and research on the SARS-CoV-2 pandemic in Scotland. The study includes the objective of understanding COVID-19 natural history and long term sequelae through studying healthcare utilisation across the primary-secondary-tertiary care interface.

OpenSAFELY is a secure, transparent, open-source software platform for analysis of electronic health records data with all activity publicly logged. The establishment of the OpenSAFELY platform was approved by the Health Research Authority (REC reference 20/LO/0651). The OpenSAFELY research platform adheres to the data protection principles

1  
2  
3 of the UK Data Protection Act 2018 and the EU General Data Protection Regulation (GDPR)  
4 2016 (for further details please see supplementary information).  
5  
6

7  
8 The Welsh Con-COV research platform was created to determine demographic,  
9 socioeconomic and clinical risk factors for infection and mortality of COVID-19, to measure  
10 impact of COVID-19 on healthcare utilisation and long-term health, and to enable the  
11 evaluation of natural experiments of policy intervention <sup>28</sup>. The project (SAIL 0911) was  
12 approved by the independent Information Governance Review Panel (IGRP). Investigation of  
13 the long-term healthcare burden of COVID-19 in children falls under this remit thus Con-  
14 COV is approved for use. Approved researchers are also able to access additional  
15 information within Con-COV that has been brought to SAIL under the Digital Economy Act  
16 (DEA) to Accredited Researchers via the SAIL Databank <sup>29</sup>.  
17  
18  
19  
20  
21  
22  
23

24  
25 Guidelines for the Strengthening the Reporting of Observational Studies in Epidemiology  
26 (STROBE) and REporting of studies Conducted using Observational Routinely-collected  
27 Data (RECORD) (via the COVID-19 extension) will be followed to report findings from this  
28 study. Findings will be presented at international conferences and published in peer-  
29 reviewed journals. Reports will also be prepared for policy makers. All analysis code will be  
30 made available through a public GitHub repository. In addition, a methods guide to  
31 producing harmonised metrics of paediatric healthcare costs across the three nations will be  
32 developed with associated code. Code lists to map and classify long term health conditions  
33 in paediatric populations in routine primary and secondary care datasets will be made  
34 available through OpenCodelists ([www.opencodelists.org](http://www.opencodelists.org)). Meta-data will be made available  
35 via the HDR-UK Innovation Gateway.  
36  
37  
38  
39  
40  
41  
42  
43  
44  
45  
46  
47

## 48 Funding

49  
50 This research is part of the Data and Connectivity National Core Study, led by Health Data  
51 Research UK in partnership with the Office for National Statistics and funded by UK  
52 Research and Innovation (grant ref MC\_PC\_20058). This work was also supported by The  
53 Alan Turing Institute via 'Towards Turing 2.0' EPSRC Grant Funding. The grant period spans  
54 01/11/21 to 30/09/22.  
55  
56  
57  
58  
59  
60

## Acknowledgements

The cohorts included in this work have been funded separately as follows:

ISARIC / CO-CIN is supported by grants from the National Institute for Health Research (award CO-CIN-01) and the Medical Research Council (grant MC\_PC\_19059) and by the National Institute for Health Research Health Protection Research Unit (NIHR HPRU) in Emerging and Zoonotic Infections at University of Liverpool in partnership with Public Health England (PHE), in collaboration with Liverpool School of Tropical Medicine and the University of Oxford (NIHR award 200907), Wellcome Trust and Department for International Development (215091/Z/18/Z), and the Bill and Melinda Gates Foundation (OPP1209135).

EAVE II is funded by the Medical Research Council [MR/R008345/1] and supported by the Scottish Government. This work is supported by BREATHE—The Health Data Research Hub for Respiratory Health [MC\_PC\_19004]. BREATHE is funded through the UK Research and Innovation Industrial Strategy Challenge Fund and delivered through Health Data Research UK.

OpenSAFELY is jointly funded by UKRI [COV0076;MR/V015737/1] NIHR and Asthma UK-BLF and the Longitudinal Health and Wellbeing strand of the National Core Studies programme. The OpenSAFELY data science platform is funded by the Wellcome Trust. BG's work on better use of data in healthcare more broadly is currently funded in part by: the Wellcome Trust, NIHR Oxford Biomedical Research Centre, NIHR Applied Research Collaboration Oxford and Thames Valley, the Mohn-Westlake Foundation; all DataLab staff are supported by BG's grants on this work.

SAIL Databank is funded by Health Care Research Wales and the analysis of this work was also funded by Health Care Research Wales through the Centre for Population Health and through Health Data Research Wales/N.Ireland, which receives its funding from HDR UK Ltd (HDR-9006) funded by the UK Medical Research Council, Engineering and Physical Sciences Research Council, Economic and Social Research Council, Department of Health and Social Care (England), Chief Scientist Office of the Scottish Government Health and Social Care Directorates, Health and Social Care Research and Development Division (Welsh Government), Public Health Agency (Northern Ireland), British Heart Foundation

(BHF) and the Wellcome Trust. This work was supported by the Con-COV team funded by the Medical Research Council (grant number: MR/V028367/1).

Funders had no role in the study design, collection, analysis, and interpretation of data; in the writing of the report; and in the decision, submit the article for publication.

### Author's contributions

OVS, NIL, EMH, PSH, MGS, SB, BG and ABD were responsible for conception of this project. OVS, LAT, AJW, MJS, JF, BG, SB and ABD will be responsible for data curation. OVS, NIL, EMH, LAT, AJW, MJS, JF, SS and ABD will be undertaking the analysis for this protocol. OVS, NIL, EMH, JKB, MGS, BG, SB, AS and ABD were responsible for securing funding for this project or its constituent cohorts. OVS, NIL, EMH, LAT, AJW, MJS, LP, JF, PSH, SS, JP, JSA, FFS, SVK, CRS, MGS, SB and ABD designed the analysis plan. OVS and ABD are providing administrative support to this project. LAT, AJW, MS, JP, JA, FFS, JKB, AA, RL, MGS, BG, SB, AS and ABD are providing resources to this project. EMH, LAT, AJW, MJS, SS and BG are providing software for this project. MGS, AS and ABD are providing supervision. EMH, LAT, AJW, MJS, JF, TCW and SS will be responsible for data validation. OVS, EMH, AJW, MJS and SS are responsible for data visualisation. OVS, NIL, EMH, LAT, AJW, MJS, LP, PSH, SS and ABD wrote the original draft of this protocol and all authors were involved in the review and editing of this manuscript.

### Competing Interests

**OVS** reports an institutional payment from HDR-UK/Alan Turing for work on this study. **LAT** reports institutional contracts with UKRI, NIHR, MRC, institutional consulting fees from Bayer, support to attend MHRA meetings and unpaid membership of two non-industry funded trial advisory committees. **MS** reports an institutional payment from HDR-UK/Alan Turing for work on this study. **CRS** reports institutional grants from MBIE, HRC and MRC. **SVK** reports funding from NRS, MRC and the Scottish Government Chief Scientist Office. He was co-chair of the Scottish Government's Expert Reference Group on Ethnicity and COVID-19 and a member of the UK Scientific Advisory Group on Emergencies subgroup on

1  
2  
3 ethnicity. **MGS** reports grants from NIHR, MRC and Health Protection Research Unit in  
4 Emerging & Zoonotic Infections, University of Liverpool. He also reports a role as  
5 Independent external and non-remunerated member of Pfizer's External Data Monitoring  
6 Committee for their mRNA vaccine program. He is Chair of Infectious Disease Scientific  
7 Advisory Board for Integrum Scientific LLC, Greensboro, NC, USA and director of MedEx  
8 Solutions Ltd. He reports minority stock ownership for Integrum Scientific LLC, Greensboro,  
9 NC, USA and majority stock ownership for MedEx Solutions Ltd. He also reports a gift from  
10 Chiesi Farmaceutici SPA to his institution of a clinical trial investigational medicinal product  
11 without encumbrance and distribution of same to trial sites. He is also a non-remunerated  
12 independent member of HMG UK Scientific Advisory Group for Emergencies (SAGE,  
13 COVID-19 Response) and HMG UK New Emerging Respiratory Virus Threats Advisory  
14 Group (NERVTAG). **SB** has received an institutional payment from HDR-UK/Alan Turing  
15 funding UOE Ref: 11563729 for work on this study. She also reports institutional payments  
16 from MRC, Welsh Government and NIHR. She is a member of the Population and Systems  
17 Medicine MRC board. **AS** reports an institutional payment from HDR-UK/Alan Turing and  
18 research grants for EAVE II and BREATHE Hub. He also reports non-remunerated positions  
19 on AstraZeneca's Thrombotic Thrombocytopenic Taskforce and Scottish and UK  
20 Government Advisory Committees. **RAL** is a member of the Welsh Government COVID-19  
21 Technical Advisory Group. **BG** has received research funding from HDRUK, the Laura and  
22 John Arnold Foundation, the Wellcome Trust, the NIHR Oxford Biomedical Research Centre,  
23 the NHS National Institute for Health Research School of Primary Care Research, the Mohn-  
24 Westlake Foundation, the Good Thinking Foundation, the Health Foundation, and the World  
25 Health Organisation; he also receives personal income from speaking and writing for lay  
26 audiences on the misuse of science.

27  
28  
29 **AJW, NIL, EMH, LP, JF, PSH, SS, AA, TCW, JP, JSA, FFS, JKB and ABD** report no  
30 competing interests.  
31  
32  
33  
34  
35  
36  
37  
38  
39  
40  
41  
42  
43  
44  
45  
46  
47  
48  
49  
50  
51  
52  
53  
54  
55  
56  
57  
58  
59  
60

## References

1. Docherty AB, Harrison EM, Green CA, et al. Features of 20 133 UK patients in hospital with covid-19 using the ISARIC WHO Clinical Characterisation Protocol: prospective observational cohort study. *BMJ*, 369. Epub ahead of print 22 May 2020. DOI: 10.1136/bmj.m1985.
2. Swann OV, Holden KA, Turtle L, et al. Clinical characteristics of children and young people admitted to hospital with covid-19 in United Kingdom: prospective multicentre observational cohort study. *BMJ*, 370. Epub ahead of print 27 August 2020. DOI: 10.1136/bmj.m3249.
3. Birrel P, Blake J, van Leeuwen E, et al. Report on Nowcasting and Forecasting - 9th December 2021. *MRC Biostatistics Unit*, <https://www.mrc-bsu.cam.ac.uk/nowcasting/report-on-nowcasting-and-forecasting-9th-december-2021/> (accessed 9 February 2022).
4. Whittaker E, Bamford A, Kenny J, et al. Clinical Characteristics of 58 Children With a Pediatric Inflammatory Multisystem Syndrome Temporally Associated With SARS-CoV-2. *JAMA*. Epub ahead of print 8 June 2020. DOI: 10.1001/jama.2020.10369.
5. Payne AB, Gilani Z, Godfred-Cato S, et al. Incidence of Multisystem Inflammatory Syndrome in Children Among US Persons Infected With SARS-CoV-2. *JAMA Netw Open* 2021; 4: e2116420.
6. Behnood SA, Shafran R, Bennett S, et al. *Persistent Symptoms Following SARS-CoV-2 Infection Among Children and Young People: A Meta-Analysis of Controlled and Uncontrolled Studies*. SSRN Scholarly Paper ID 3940260, Rochester, NY: Social Science Research Network. Epub ahead of print 12 October 2021. DOI: 10.2139/ssrn.3940260.
7. Al-Aly Z, Xie Y, Bowe B. High-dimensional characterization of post-acute sequelae of COVID-19. *Nature* 2021; 594: 259–264.
8. Koumpias AM, Schwartzman D, Fleming O. Long-haul COVID: healthcare utilization and medical expenditures 6 months post-diagnosis. *BMC Health Serv Res* 2022; 22: 1010.
9. Magnusson K, Skyrud KD, Suren P, et al. Healthcare use in 700 000 children and adolescents for six months after covid-19: before and after register based cohort study. *BMJ* 2022; 376: e066809.



10. Zoabi Y, Deri-Rozov S, Shomron N. Machine learning-based prediction of COVID-19 diagnosis based on symptoms. *Npj Digit Med* 2021; 4: 1–5.
11. Office for National Statistics. Coronavirus (COVID-19) Infection Survey technical article: waves and lags of COVID-19 in England, June 2021, <https://www.ons.gov.uk/peoplepopulationandcommunity/healthandsocialcare/conditionsanddiseases/articles/coronaviruscovid19infectionsurveytechnicalarticle/wavesandlagsofcovid19inenglandjune2021> (2021, accessed 17 December 2021).
12. Kontopantelis E, Stevens RJ, Helms PJ, et al. Spatial distribution of clinical computer systems in primary care in England in 2016 and implications for primary care electronic medical record databases: a cross-sectional population study. *BMJ Open* 2018; 8: e020738.
13. Surveillance definitions for COVID-19. *European Centre for Disease Prevention and Control*, <https://www.ecdc.europa.eu/en/covid-19/surveillance/surveillance-definitions> (accessed 17 December 2021).
14. Williamson EJ, Walker AJ, Bhaskaran K, et al. OpenSAFELY: factors associated with COVID-19 death in 17 million patients. *Nature* 2020; 584: 430–436.
15. Lyons RA, Jones KH, John G, et al. The SAIL databank: linking multiple health and social care datasets. *BMC Med Inform Decis Mak* 2009; 9: 3.
16. Simpson CR, Robertson C, Vasileiou E, et al. Early Pandemic Evaluation and Enhanced Surveillance of COVID-19 (EAVE II): protocol for an observational study using linked Scottish national data. *BMJ Open* 2020; 10: e039097.
17. Zhu Y, Matsuyama Y, Ohashi Y, et al. When to conduct probabilistic linkage vs. deterministic linkage? A simulation study. *J Biomed Inform* 2015; 56: 80–86.
18. Fraser LK, Murtagh FEM, Sheldon T, et al. Health of mothers of children with a life-limiting condition: a protocol for comparative cohort study using the Clinical Practice Research Datalink. *BMJ Open* 2020; 10: e034024.
19. Ward JL, Harwood R, Smith C, et al. Risk factors for PICU admission and death among children and young people hospitalized with COVID-19 and PIMS-TS in England during the first pandemic year. *Nat Med* 2021; 1–8.



- 1  
2  
3  
4 20. Adeloye D, Katikireddi SV, Woolford L, et al. Uptake, effectiveness and safety of COVID-  
5 19 vaccines in children and young people in Scotland: protocol for early pandemic  
6 evaluation and enhanced surveillance of COVID-19 (EAVE II). *J Glob Health*.  
7  
8  
9 21. Curtis LA, Burns A. *Unit Costs of Health & Social Care 2020*. PSSRU, University of Kent,  
10 <https://www.pssru.ac.uk/project-pages/unit-costs/unit-costs-2020/> (2020, accessed 9  
11 December 2021).  
12  
13  
14  
15 22. Swann OV, Pollock L, Holden KA, et al. Comparison of children and young people  
16 admitted with SARS-CoV-2 across the UK in the first and second pandemic waves:  
17 prospective multicentre observational cohort study. 2021; 2021.09.14.21263567.  
18  
19  
20  
21 23. Green MA, García-Fiñana M, Barr B, et al. Evaluating social and spatial inequalities of  
22 large scale rapid lateral flow SARS-CoV-2 antigen testing in COVID-19 management: An  
23 observational study of Liverpool, UK (November 2020 to January 2021). *Lancet Reg  
24 Health - Eur* 2021; 6: 100107.  
25  
26  
27  
28 24. Jung T, Wickrama K a. S. An Introduction to Latent Class Growth Analysis and Growth  
29 Mixture Modeling. *Soc Personal Psychol Compass* 2008; 2: 302–317.  
30  
31  
32 25. Frühwirth-Schnatter S, Pamminger C. Model-based clustering of categorical time series.  
33 *Bayesian Anal* 2010; 5: 345–368.  
34  
35  
36 26. Franses PH, Wiemann T. Intertemporal Similarity of Economic Time Series: An  
37 Application of Dynamic Time Warping. *Comput Econ* 2020; 56: 59–75.  
38  
39  
40  
41 27. People with a positive lateral flow test no longer required to take confirmatory PCR test.  
42 *GOV.UK*, [https://www.gov.uk/government/news/people-with-a-positive-lateral-flow-test-](https://www.gov.uk/government/news/people-with-a-positive-lateral-flow-test-no-longer-required-to-take-confirmatory-pcr-test)  
43 [no-longer-required-to-take-confirmatory-pcr-test](https://www.gov.uk/government/news/people-with-a-positive-lateral-flow-test-no-longer-required-to-take-confirmatory-pcr-test) (accessed 18 January 2022).  
44  
45  
46  
47 28. Lyons J, Akbari A, Torabi F, et al. Understanding and responding to COVID-19 in Wales:  
48 protocol for a privacy-protecting data platform for enhanced epidemiology and evaluation  
49 of interventions. *BMJ Open* 2020; 10: e043010.  
50  
51  
52 29. Jones KH, Ford DV, Jones C, et al. A case study of the Secure Anonymous Information  
53 Linkage (SAIL) Gateway: a privacy-protecting remote access system for health-related  
54 research and evaluation. *J Biomed Inform* 2014; 50: 196–204.  
55  
56  
57  
58  
59  
60

1  
2  
3  
4  
5  
6  
7  
8  
9  
10  
11 *Figure 1. Graphical illustrations of potential study scenarios with test negative controls.*

12 **Example A: Positive SARS-CoV-2 RT-PCR case.** Individual A is followed-up from 14 days after SARS-CoV-2  
13 infection for 12 months. **Examples B-D: Test negative controls.** Individual B is matched to an individual with  
14 SARS-CoV-2 infection and followed-up from 14 days after matching for 12 months. Individual C is matched to an  
15 individual with SARS-CoV-2 infection and followed-up from 14 days after matching until they are first recorded  
16 with SARS-CoV-2 infection themselves during the RT-PCR testing period of interest. At this point they are  
17 censored from further follow-up as a test negative comparator and followed-up as an exposed case from 14 days  
18 after infection for 12 months with appropriate matches for the date of positive RT-PCR. Individual D is matched to  
19 an individual with SARS-CoV-2 infection and followed-up from 14 days after matching until they are first recorded  
20 with SARS-CoV-2 infection themselves. As this occurs after the RT-PCR testing period of interest, they are  
21 censored from further follow-up as an unexposed comparator.  
22  
23  
24  
25  
26  
27  
28  
29  
30  
31  
32  
33  
34  
35  
36  
37  
38  
39  
40  
41  
42  
43  
44  
45  
46  
47  
48  
49  
50  
51  
52  
53  
54  
55  
56  
57  
58  
59  
60

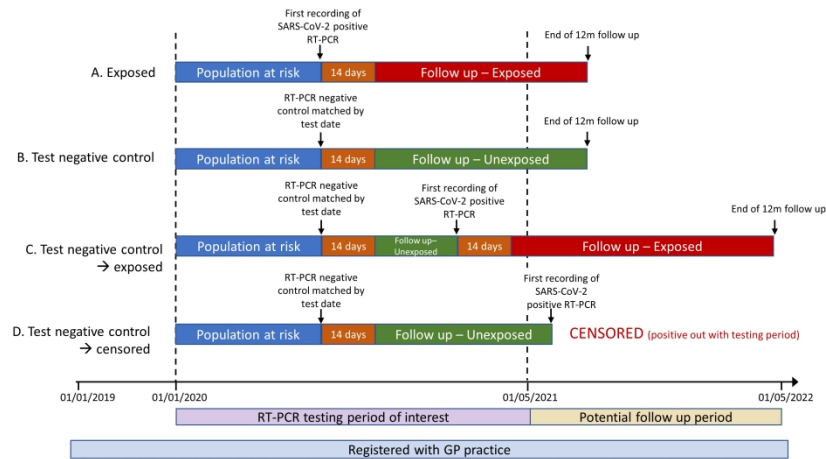

Figure 1. Graphical illustrations of potential study scenarios with test negative controls.

Example A: Positive SARS-CoV-2 RT-PCR case.

Individual A is followed-up from 14 days after SARS-CoV-2 infection for 12 months.

Examples B-D: Test negative controls.

Individual B is matched to an individual with SARS-CoV-2 infection and followed-up from 14 days after matching for 12 months.

Individual C is matched to an individual with SARS-CoV-2 infection and followed-up from 14 days after matching until they are first recorded with SARS-CoV-2 infection themselves during the RT-PCR testing period of interest. At this point they are censored from further follow-up as a test negative comparator and followed-up as an exposed case from 14 days after infection for 12 months with appropriate matches for the date of positive RT-PCR.

Individual D is matched to an individual with SARS-CoV-2 infection and followed-up from 14 days after matching until they are first recorded with SARS-CoV-2 infection themselves. As this occurs after the RT-PCR testing period of interest, they are censored from further follow-up as an unexposed comparator.

338x190mm (300 x 300 DPI)

Studying the Long-term Impact of COVID-19 in Kids (SLICK).  
Healthcare use and costs in children and young people following  
community-acquired SARS-CoV-2 infection: protocol for an  
observational study using linked primary and secondary routinely  
collected healthcare data from England, Scotland and Wales.

## Supplementary Information

*Supplementary Table 1 – Datasets available and Trusted Research Environments*

| Country  | Trusted Research Environment | Datasets and linkages                                                                                                                                                                                                                                                                                                                                                                                                                                                                                                                                                                                                                                                                         |
|----------|------------------------------|-----------------------------------------------------------------------------------------------------------------------------------------------------------------------------------------------------------------------------------------------------------------------------------------------------------------------------------------------------------------------------------------------------------------------------------------------------------------------------------------------------------------------------------------------------------------------------------------------------------------------------------------------------------------------------------------------|
| Scotland | Scottish National Safe Haven | <b>SMR00</b> – Outpatient appointments and attendances<br><b>SMR01</b> – General acute inpatient and day case<br><b>SMR04</b> – Mental health inpatient and day case<br><b>SMR06</b> – Scottish cancer registry<br><b>COVID Tests</b> – Laboratory SARS-CoV-2 tests<br><b>Prescribing Information System</b> – Community prescriptions<br><b>Accident and Emergency Datamart</b><br><b>GP out of hours</b><br><b>Scottish Ambulance Service</b><br><b>NHS24 calls</b><br><b>NRS Deaths</b><br><b>NRS Infant deaths</b><br><b>EAVE II</b> – Scheduled and unscheduled primary care<br><b>ISARIC4C/CO-CIN</b><br><b>COGUK</b> – SARS-CoV-2 variant<br><b>TVMT</b> – SARS-Cov-2 vaccination data |
| England  | OpenSAFELY                   | <b>TPP</b> - Primary Care<br><b>SGSS COVID testing data</b><br><b>ONS death certificates</b> – available from 2019-02-01<br><b>SUS APCS</b> (inpatient hospital) – available from 2016-04-01<br><b>SUS OPA</b> (outpatient hospital) – available from 2019-04-01<br><b>SUS ECDS</b> (emergency care) – available from 2017-10-01<br><b>ISARIC4C/CO-CIN</b>                                                                                                                                                                                                                                                                                                                                    |
| Wales    | SAIL                         | <b>ConCOV</b> - Wales Multimorbidity Cohort (WMC) - COVID-19<br><b>WLGP</b> – Primary care<br><b>PEDW</b> – Secondary care (inpatient & day case)<br><b>ADDE</b> – ONS mortality data<br><b>CCDS</b> – Critical care<br><b>CDDS</b> – Consolidate deaths from COVID-19                                                                                                                                                                                                                                                                                                                                                                                                                        |

|    |  |                                                                               |
|----|--|-------------------------------------------------------------------------------|
| 1  |  | <b>CENW</b> – Census 2011                                                     |
| 2  |  | <b>CTTP</b> – COVID-19 test, trace and protect                                |
| 3  |  | <b>CVLF</b> – COVID-19 lateral flow tests                                     |
| 4  |  | <b>CVSP</b> – COVID-19 shielded people                                        |
| 5  |  | <b>CVVD</b> – COVID-19 vaccines                                               |
| 6  |  | <b>EDDD</b> – Emergency department (daily)                                    |
| 7  |  | <b>EDDS</b> – Emergency department                                            |
| 8  |  | <b>ICCD</b> – intensive care national audit (COVID only admissions)           |
| 9  |  | <b>ICNC</b> – intensive care national audit                                   |
| 10 |  | <b>MIDS</b> – Maternity initial screening and birth                           |
| 11 |  | <b>NCCH</b> – National community child health (maternity, childbirth, etc)    |
| 12 |  | <b>NHSO</b> – NHS 111, out of hours                                           |
| 13 |  | <b>OPDW</b> – Outpatients                                                     |
| 14 |  | <b>OPRD</b> – Outpatient referrals                                            |
| 15 |  | <b>PATD</b> – COVID-19 lab tests                                              |
| 16 |  | <b>RTTD</b> – Referral to treatment times                                     |
| 17 |  | <b>WASD</b> – Welsh ambulance service                                         |
| 18 |  | <b>WCSU</b> – Welsh cancer incidence surveillance unit                        |
| 19 |  | <b>WDDS</b> – Welsh prescription dispensing                                   |
| 20 |  | <b>WDSO</b> – Individuals registered with GP, addresses/household information |
| 21 |  | <b>CRCS</b> – Children in care or receiving support register                  |
| 22 |  | <b>CYFI</b> – Cystic Fibrosis register                                        |
| 23 |  | <b>BREC</b> – Register of all children in Wales with type 1 diabetes          |
| 24 |  | <b>ISARIC4C/CO-CIN</b>                                                        |

**Abbreviations:** **SMR:** Scottish Morbidity Record, **NRS:** National Records of Scotland **EAVE-II:** Early Pandemic Evaluation and Enhanced Surveillance of COVID-19, **ISARIC/CO-CIN:** International Severe Acute Respiratory and emerging Infection Consortium / COVID-19 Clinical Information Network, **COGUK:** COVID-19 Genomics UK Consortium, **TMVT:** Turas Vaccination Management Tool, **NHS:** National Health Service, **TPP:** The Phoenix Partnership (GP group), **SGSS:** Second Generation Surveillance System, **ONS:** Office for National Statistics, **SUS:** Secondary Use Services, **APCS:** Admitted patient care statistics, **OPA:** Outpatient attendances, **ECDS:** Emergency care datasets, **SAIL:** Secure Anonymised Information Linkage, **WLGP:** Welsh Longitudinal General Practice, **PEDW:** Patient Episode Database for Wales, **ADDE:** Annual District Death Extract, **CCDS:** Critical Care Data Source, **CDDS:** COVID-19 Consolidated Deaths, **CENW:** Office of National Statistics Census, **CTTP:** COVID-19 Test, Trace & Protect, **CVLF:** COVID-19 Lateral Flow, **CVSP:** COVID-19 Shielded People, **CVVD:** COVID-19 Vaccine Data, **EDDD:** Emergency Department Dataset Daily, **EDDS:** Emergency Department Dataset, **ICCD:** Intensive Care National Audit & Research Centre (ICNARC) - COVID only admissions, **ICNC:** Intensive Care National Audit & Research Centre (ICNARC), **MIDS:** Maternity Indicators Dataset, **NCCH:** National Community Child Health, **NHSO:** NHS 111 Call data, **OPDW:** Outpatient Dataset for Wales, **OPRD:** Outpatient Referral Dataset, **PATD:** Pathology Data (COVID-19 daily), **RTTD:** Referral to Treatment Times Dataset, **WASD:** Welsh Ambulance Service Dataset, **WCSU:** Welsh Cancer Incidence Surveillance Unit, **WDDS:** Welsh Dispensing Dataset, **WDSO:** Welsh Demographic Service Dataset.

Supplementary Figure A – Dataflow diagram for Wales

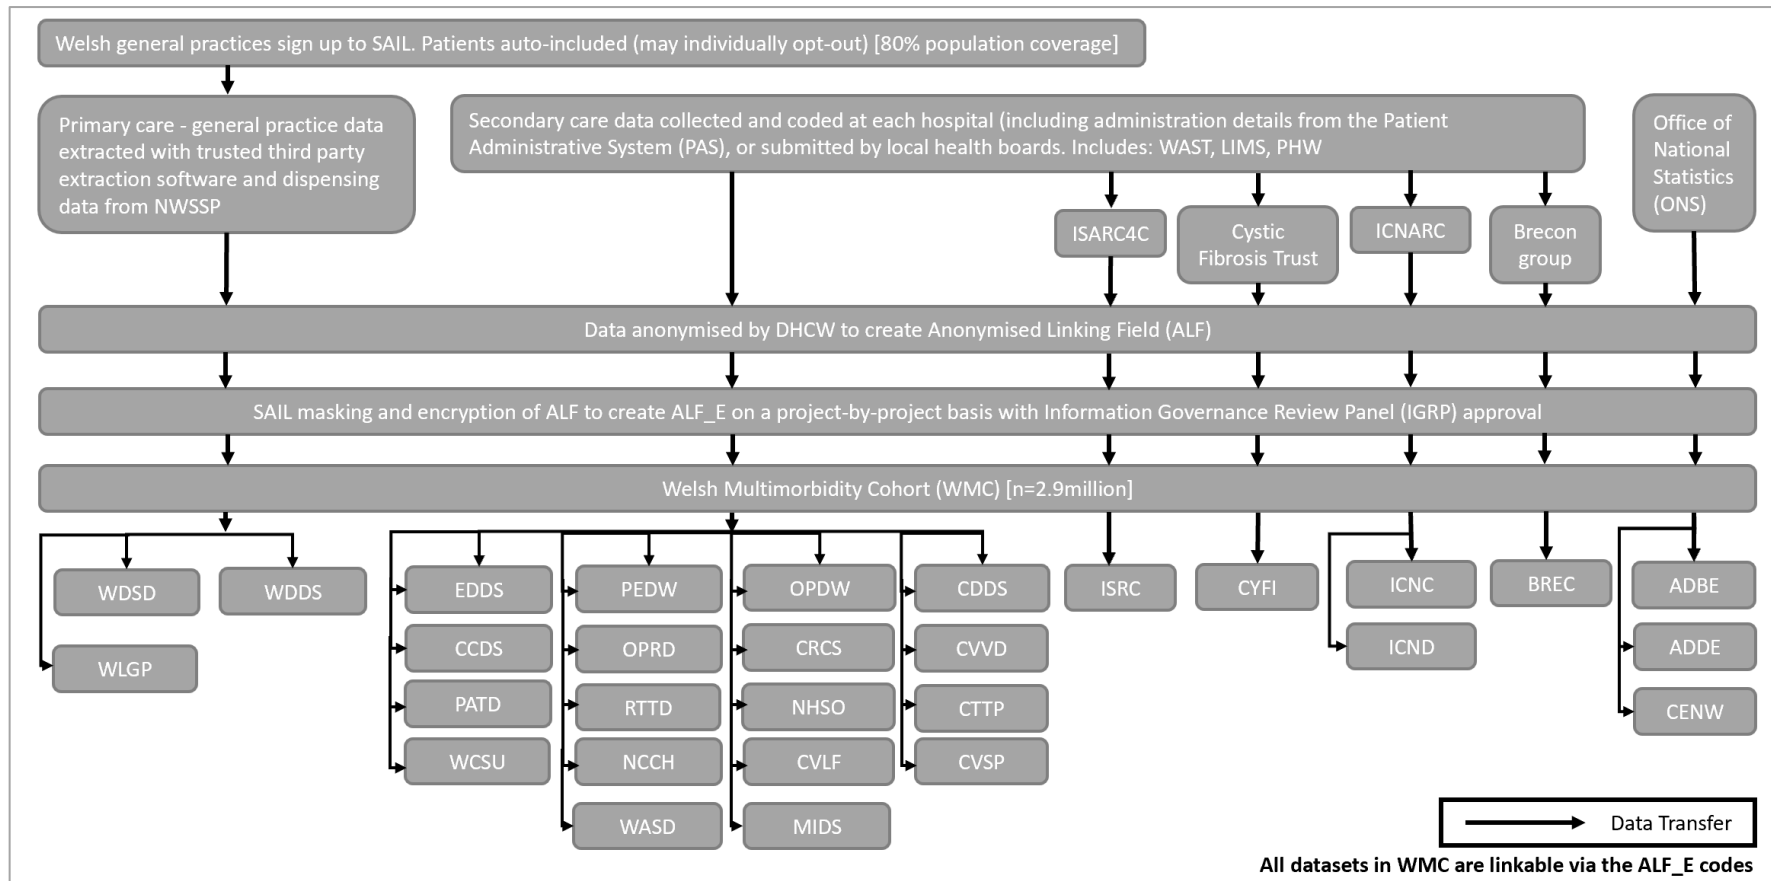

**Abbreviations:** SAIL: Secure Anonymised Information Linkage, WLGP: Welsh Longitudinal General Practice, PEDW: Patient Episode Database for Wales, ADDE: Annual District Death Extract, BREC: Brecon Cohort (Children with type 1 diabetes register), CCDS: Critical Care Data Source, CDDS: COVID-19 Consolidated Deaths, CENW: Office of National Statistics Census, CRCS: Children Receiving Care & Support Services, CTPP: COVID-19 Test, Trace & Protect, CVLF: COVID-19 Lateral Flow, CVSP: COVID-19 Shielded People, CVVD: COVID-19 Vaccine Data, CYFI: Cystic Fibrosis Register, EDDS: Emergency Department Dataset, ICCD: Intensive Care National Audit & Research Centre (ICNARC) - COVID only admissions, ICNC: Intensive Care National Audit & Research Centre (ICNARC), ISRC: International Severe Acute Respiratory & Emerging Infection Consortium, ISARIC4C: International Severe Acute Respiratory & Emerging Infection Consortium (Coronavirus Clinical Characterisation Consortium), MIDS: Maternity Indicators Dataset, NCCH: National Community Child Health, NHSO: NHS 111 Call data, OPDW: Outpatient Dataset for Wales, OPRD: Outpatient Referral Dataset, PATD: Pathology Data (COVID-19 daily), RTTD: Referral to Treatment Times Dataset, WASD: Welsh Ambulance Service Dataset, WCSU: Welsh Cancer Incidence Surveillance Unit, WDD: Welsh Dispensing Dataset, WSD: Welsh Demographic Service Dataset.

Supplementary Figure B – Dataflow diagram for Scotland

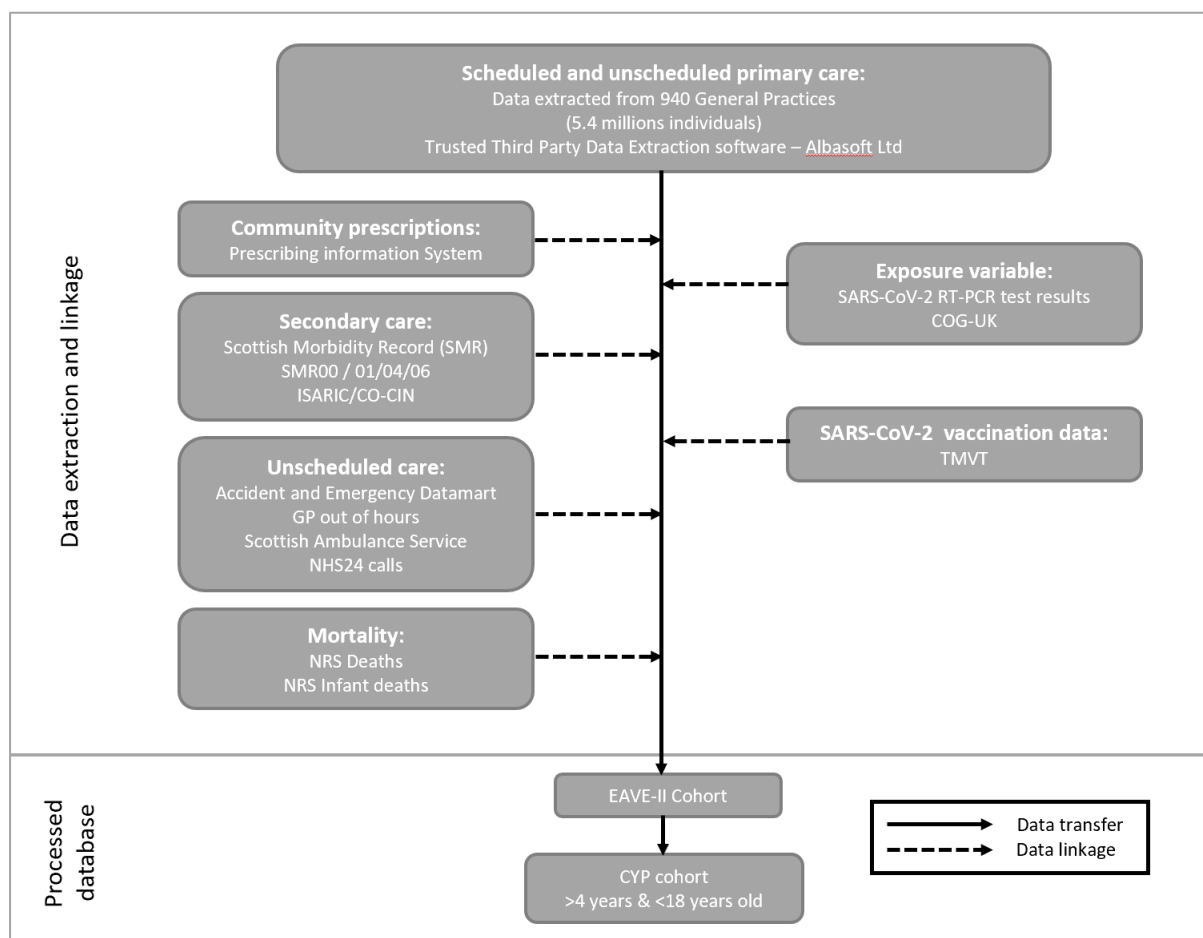

**Abbreviations:** *ISARIC/CO-CIN*: International Severe Acute Respiratory and emerging Infection Consortium / COVID-19 Clinical Information Network, *GP*: general practice; *NHS*: National Health Service, *NRS*: National Records of Scotland; *RT-PCR*: reverse transcription polymerase chain reaction, *TMVT*: Turas Vaccination Management Tool; *COG-UK*: Centre of Genomics United Kingdom, *CYP*: children and young people

Supplementary Figure C – Dataflow diagram for England

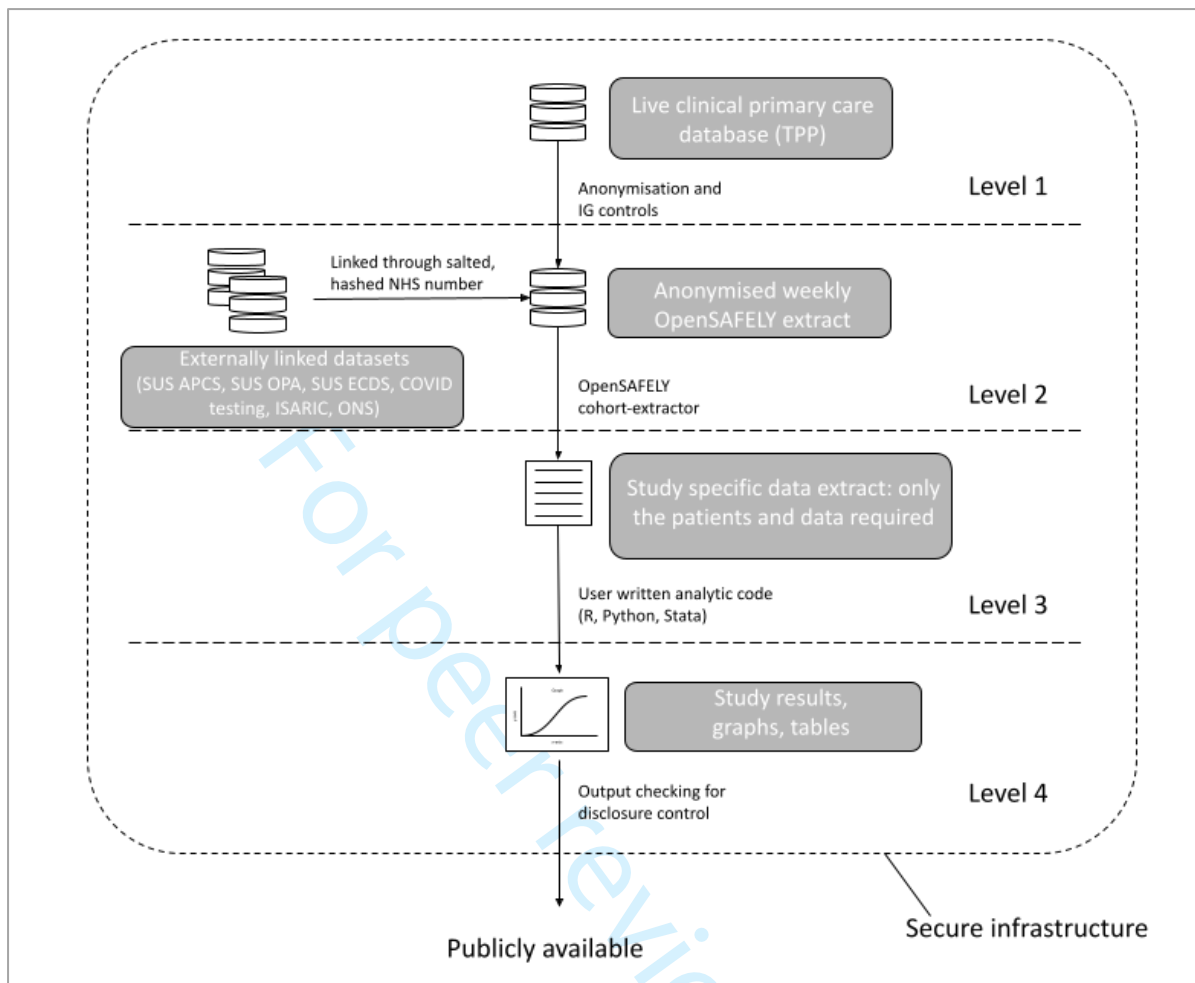

**Abbreviations:** *TPP:* The Phoenix Partnership (GP group), *SGSS:* Second Generation Surveillance System, *ONS:* Office for National Statistics, *SUS:* Secondary Use Services, *APCS:* Admitted patient care statistics, *OPA:* Outpatient attendances, *ECDS:* Emergency care datasets, *ONS:* Office for National Statistics.



Supplementary Figure D– Directed acyclic graph factors associated with SARS-CoV-2 RT-PCR testing and healthcare use



1  
2  
3  
4  
5  
6  
7  
8  
9  
10  
11  
12  
13  
14  
15  
16  
17  
18  
19  
20  
21  
22  
23  
24  
25  
26  
27  
28  
29  
30  
31  
32  
33  
34  
35  
36  
37  
38  
39  
40  
41  
42  
43  
44  
45  
46

Supplementary Figure E. Graphical illustration of potential study scenarios with population controls (Objective 2 sensitivity analysis)

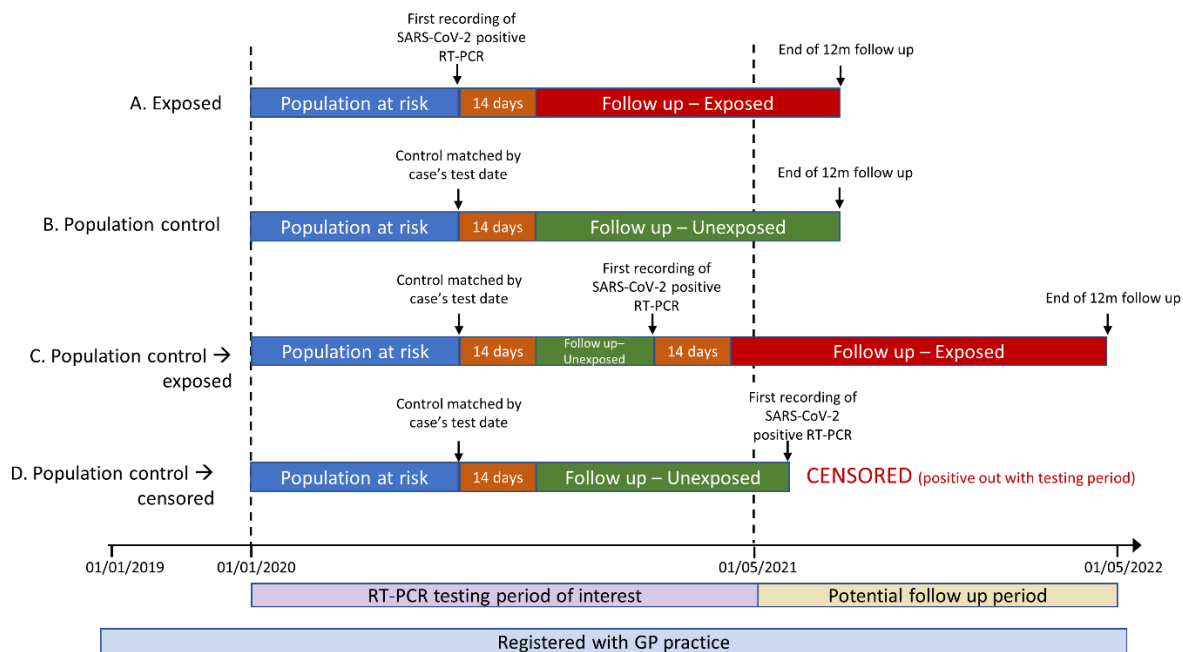

**Example A: Positive SARS-CoV-2 RT-PCR case.** Individual A is followed-up from 14 days after SARS-CoV-2 infection for 12 months. **Examples B-D: Population controls.** Individual B is matched to an individual with SARS-CoV-2 infection and followed-up from 14 days after matching for 12 months. Individual C is matched to an individual with SARS-CoV-2 infection and followed-up from 14 days after matching until they are first recorded with SARS-CoV-2 infection themselves during the RT-PCR testing period of interest. At this point they are censored from further follow-up as a test negative comparator and followed-up as an exposed case from 14 days after infection for 12 months with appropriate matches for the date of positive RT-PCR. Individual D is matched to an individual with SARS-CoV-2 infection and followed-up from 14 days after matching until they are first recorded with SARS-CoV-2 infection themselves. As this occurs after the RT-PCR testing period of interest, they are censored from further follow-up as an unexposed comparator.

1  
2  
3 *Supplementary Figure F – Logo for SLICK study*  
4  
5  
6  
7  
8  
9  
10  
11  
12  
13  
14  
15  
16  
17  
18  
19  
20  
21  
22  
23  
24  
25  
26  
27  
28

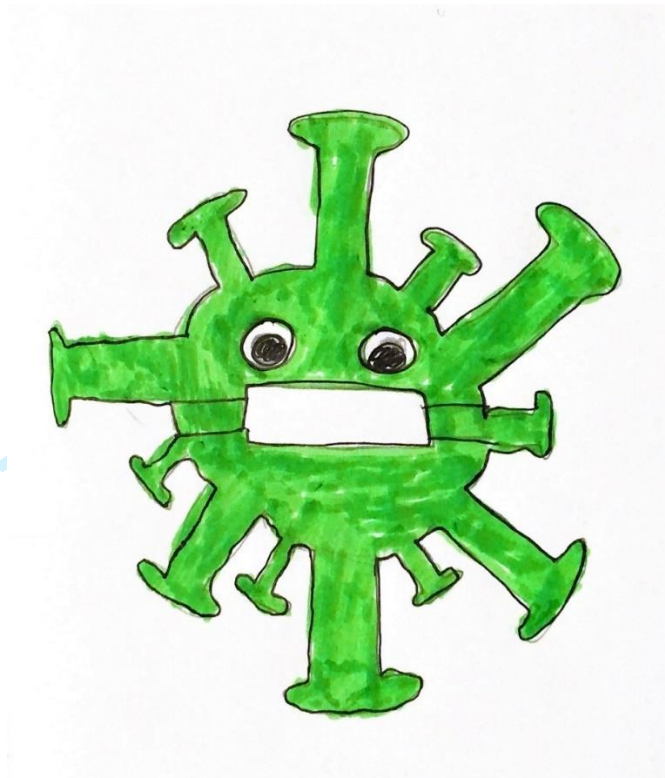

29 Designed by Georgia Langley, aged 11 (consent obtained from parent to publish child's name)  
30  
31  
32

33 *OpenSAFELY Information governance and ethical approval – further information*  
34  
35

36 NHS England is the data controller for OpenSAFELY-TPP; TPP is the data processor; all study authors  
37 using OpenSAFELY have the approval of NHS England. This implementation of OpenSAFELY is hosted  
38 within the TPP environment which is accredited to the ISO 27001 information security standard and is  
39 NHS IG Toolkit compliant.<sup>1</sup>  
40

41 Patient data has been pseudonymised for analysis and linkage using industry standard cryptographic  
42 hashing techniques; all pseudonymised datasets transmitted for linkage onto OpenSAFELY are  
43 encrypted; access to the platform is via a virtual private network (VPN) connection, restricted to a  
44 small group of researchers; the researchers hold contracts with NHS England and only access the  
45 platform to initiate database queries and statistical models; all database activity is logged; only  
46 aggregate statistical outputs leave the platform environment following best practice for  
47 anonymisation of results such as statistical disclosure control for low cell counts.<sup>2</sup>  
48  
49

50 The OpenSAFELY research platform adheres to the obligations of the UK General Data Protection  
51 Regulation (GDPR) and the Data Protection Act 2018. In March 2020, the Secretary of State for Health  
52 and Social Care used powers under the UK Health Service (Control of Patient Information) Regulations  
53 2002 (COPI) to require organisations to process confidential patient information for the purposes of  
54 protecting public health, providing healthcare services to the public and monitoring and managing the  
55 COVID-19 outbreak and incidents of exposure; this sets aside the requirement for patient consent.<sup>3</sup>  
56 This was extended in July 2022 for the NHS England OpenSAFELY COVID-19 research platform.<sup>4</sup> In  
57  
58  
59  
60

1  
2  
3 some cases of data sharing, the common law duty of confidence is met using, for example, patient  
4 consent or support from the Health Research Authority Confidentiality Advisory Group.<sup>5</sup>  
5

6 Taken together, these provide the legal bases to link patient datasets on the OpenSAFELY platform.  
7 GP practices, from which the primary care data are obtained, are required to share relevant health  
8 information to support the public health response to the pandemic, and have been informed of the  
9 OpenSAFELY analytics platform.  
10  
11  
12

### 13 *Supplementary references:*

- 14 1. Data Security and Protection Toolkit - NHS Digital. NHS Digital. <https://digital.nhs.uk/data-and-information/looking-after-information/data-security-and-information-governance/data-security-and-protection-toolkit> (accessed 30 Apr 2020).  
15  
16  
17  
18  
19
- 20 2. ISB1523: Anonymisation Standard for Publishing Health and Social Care Data - NHS Digital. NHS  
21 Digital. <https://digital.nhs.uk/data-and-information/information-standards/information-standards-and-data-collections-including-extractions/publications-and-notifications/standards-and-collections/isb1523-anonymisation-standard-for-publishing-health-and-social-care-data>  
22  
23  
24  
25  
26  
27  
28  
29
- 30 3. Secretary of State for Health and Social Care - UK Government. Coronavirus (COVID-19):  
31 notification to organisations to share information. 2020.  
32 <https://web.archive.org/web/20200421171727/https://www.gov.uk/government/publications/coronavirus-covid-19-notification-of-data-controllers-to-share-information>  
33  
34  
35  
36
- 37 4. Secretary of State for Health and Social Care - UK Government. Coronavirus (COVID-19):  
38 notification to organisations to share information. 2022.  
39 <https://www.gov.uk/government/publications/coronavirus-covid-19-notification-to-organisations-to-share-information/coronavirus-covid-19-notice-under-regulation-34-of-the-health-service-control-of-patient-information-regulations-2002>  
40  
41  
42  
43
- 44 5. Confidentiality Advisory Group. Health Research Authority. <https://www.hra.nhs.uk/about-us/committees-and-services/confidentiality-advisory-group/>  
45  
46  
47  
48  
49  
50  
51  
52  
53  
54  
55  
56  
57  
58  
59  
60
